# Supplementary material for: Shifts in microbial diversity, composition, and functionality in the gut and genital microbiome during a natural SIV infection in vervet monkeys
Source: PubMed Central journal article supplement (PMC7648414; doi:10.1186/s40168-020-00928-4), 2020-11-06

Supplementary Figure 1

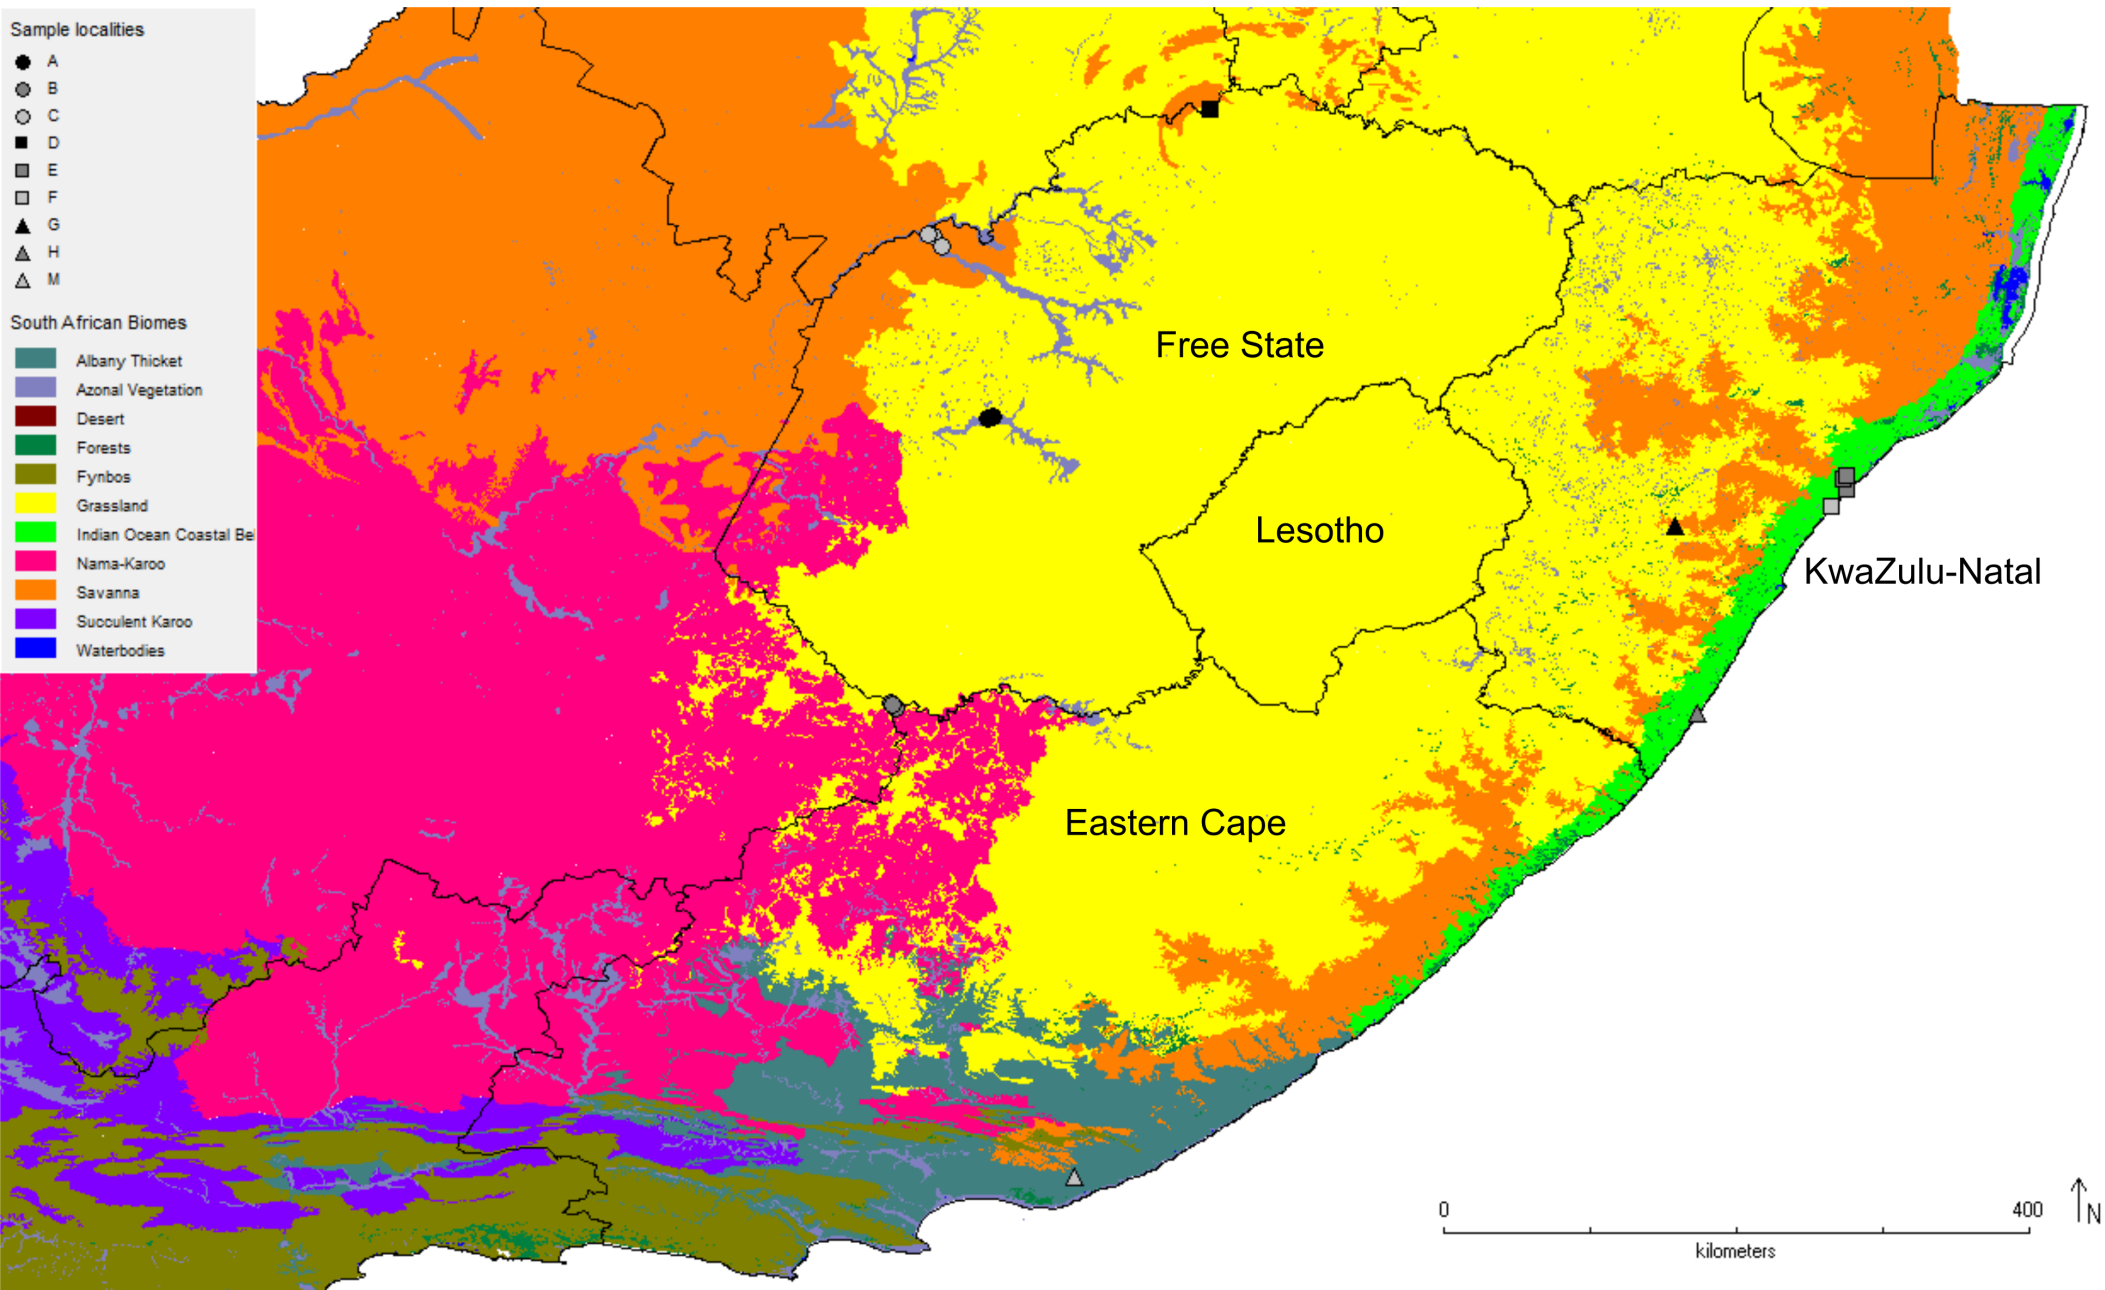



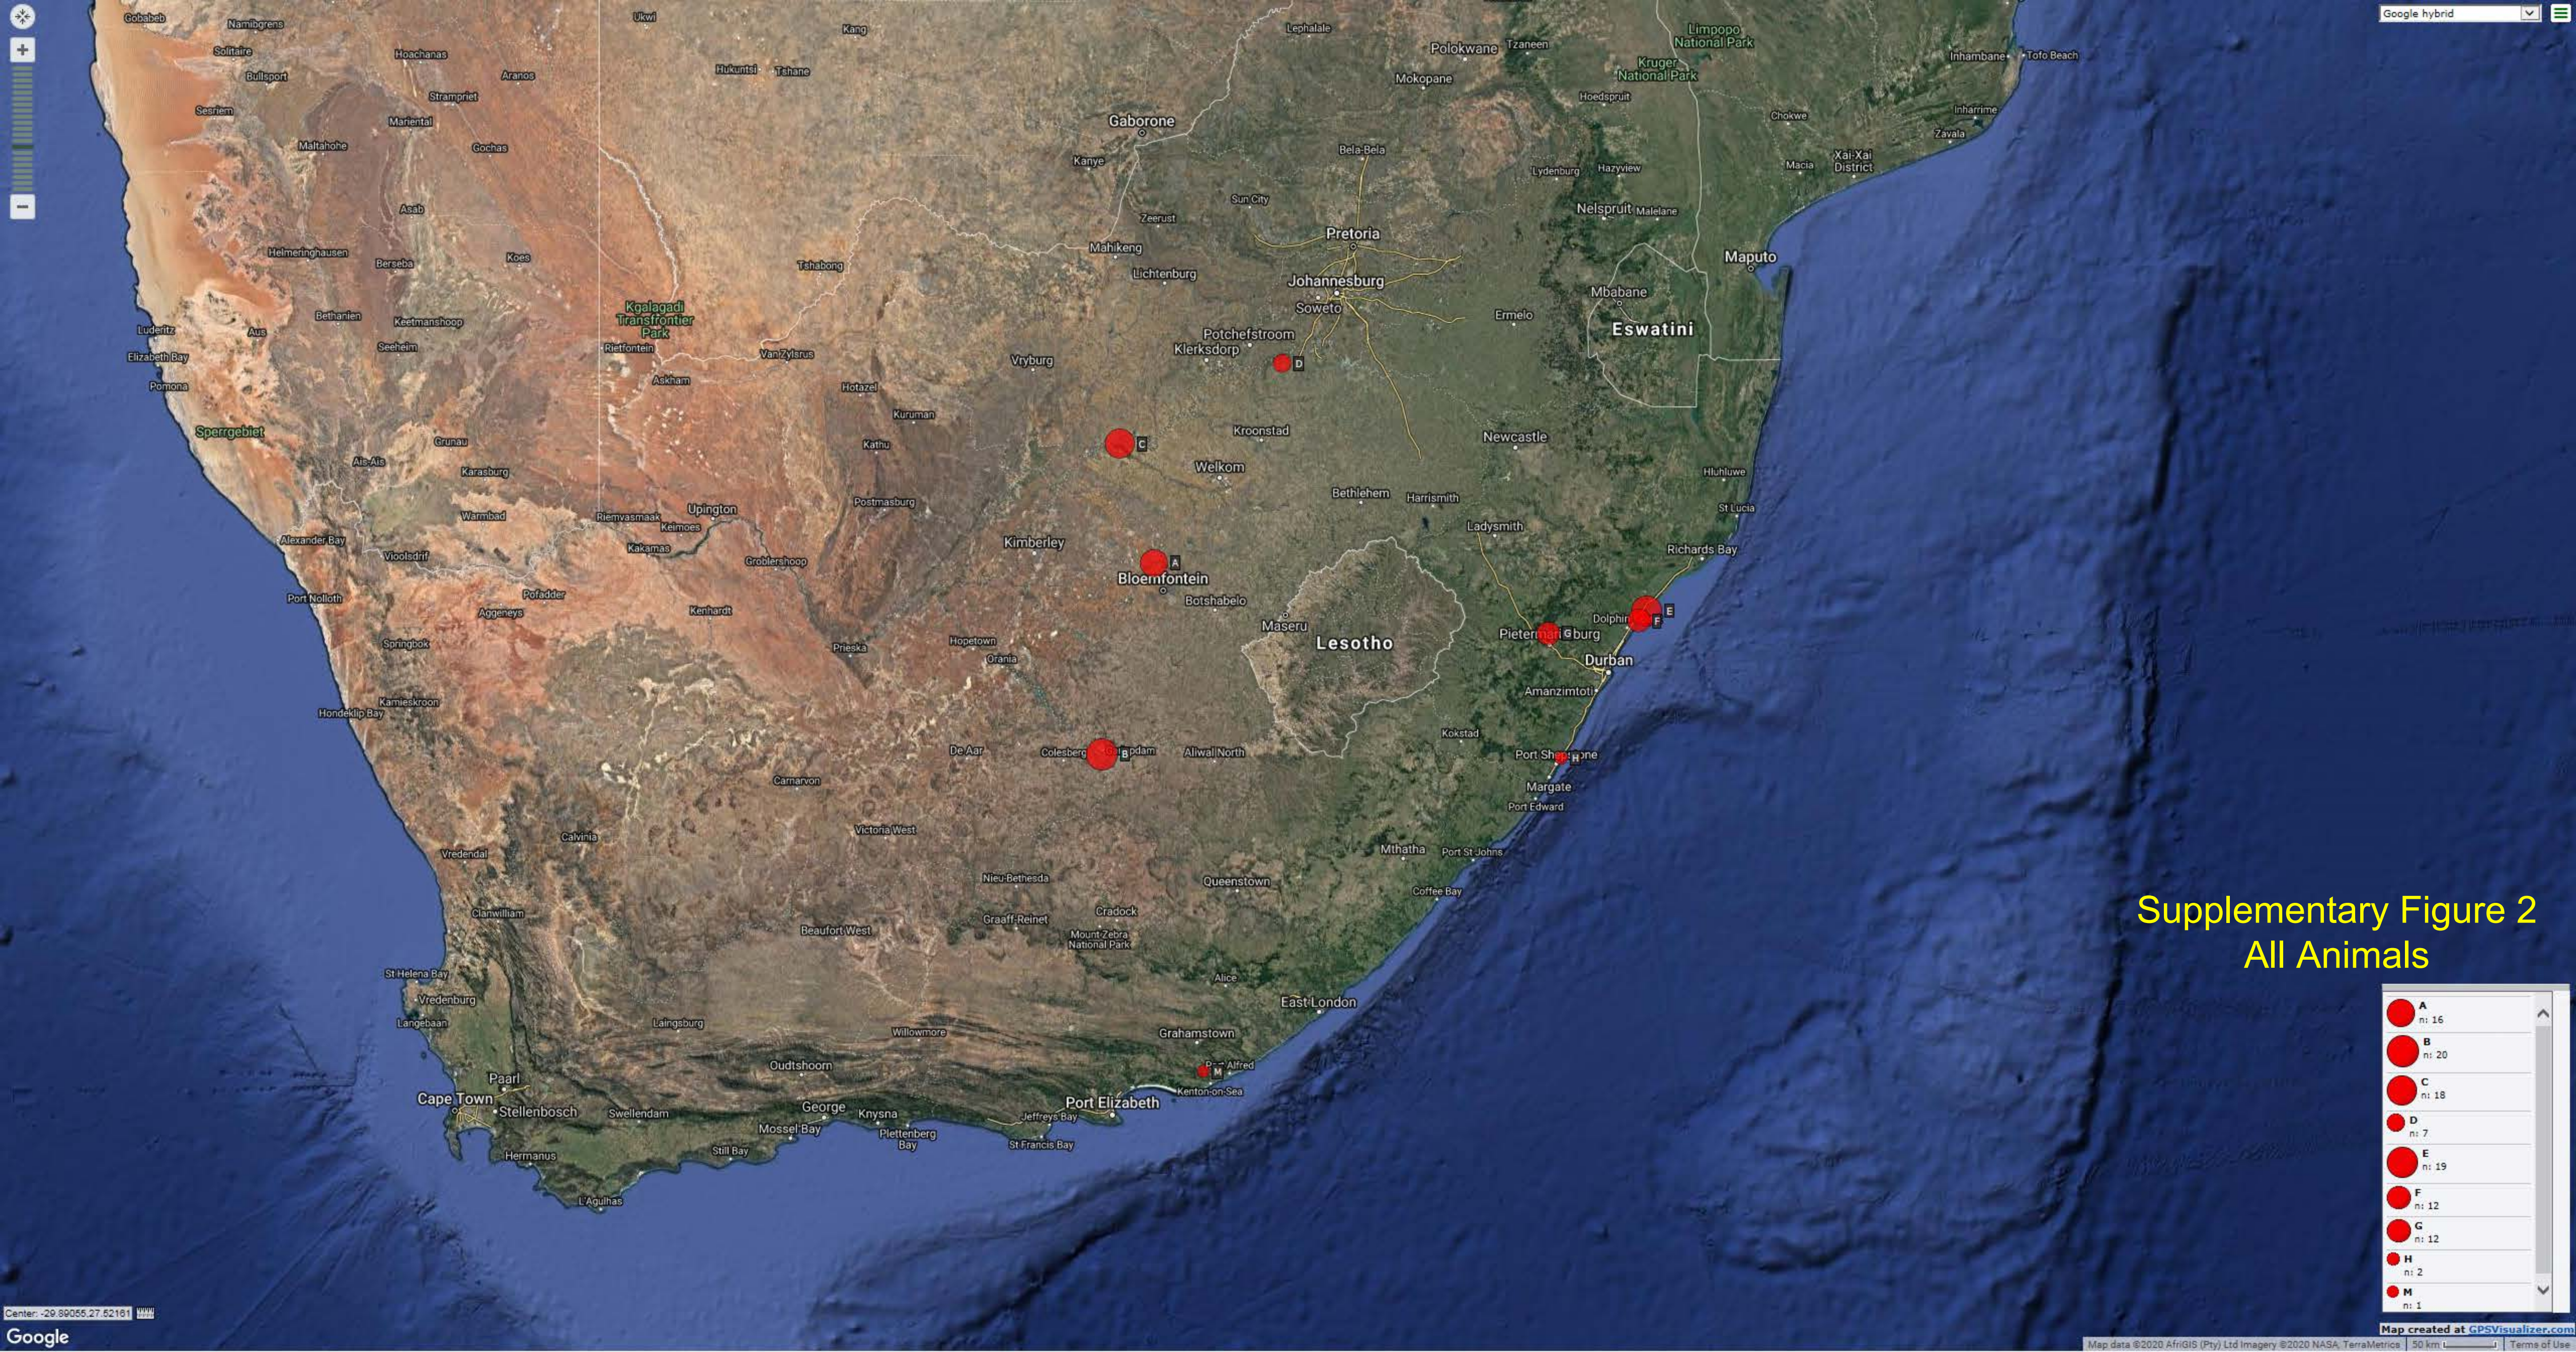

Supplementary Figure 2  
All Animals

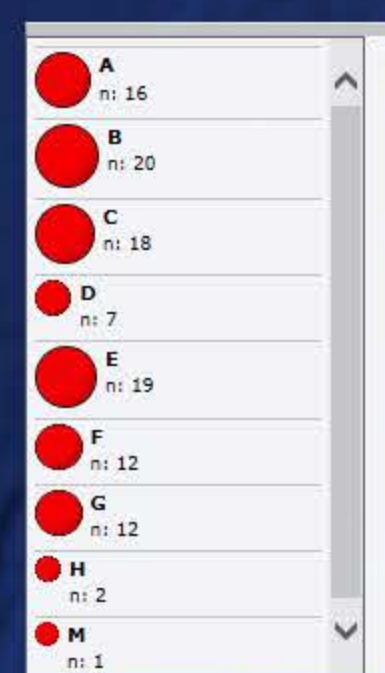



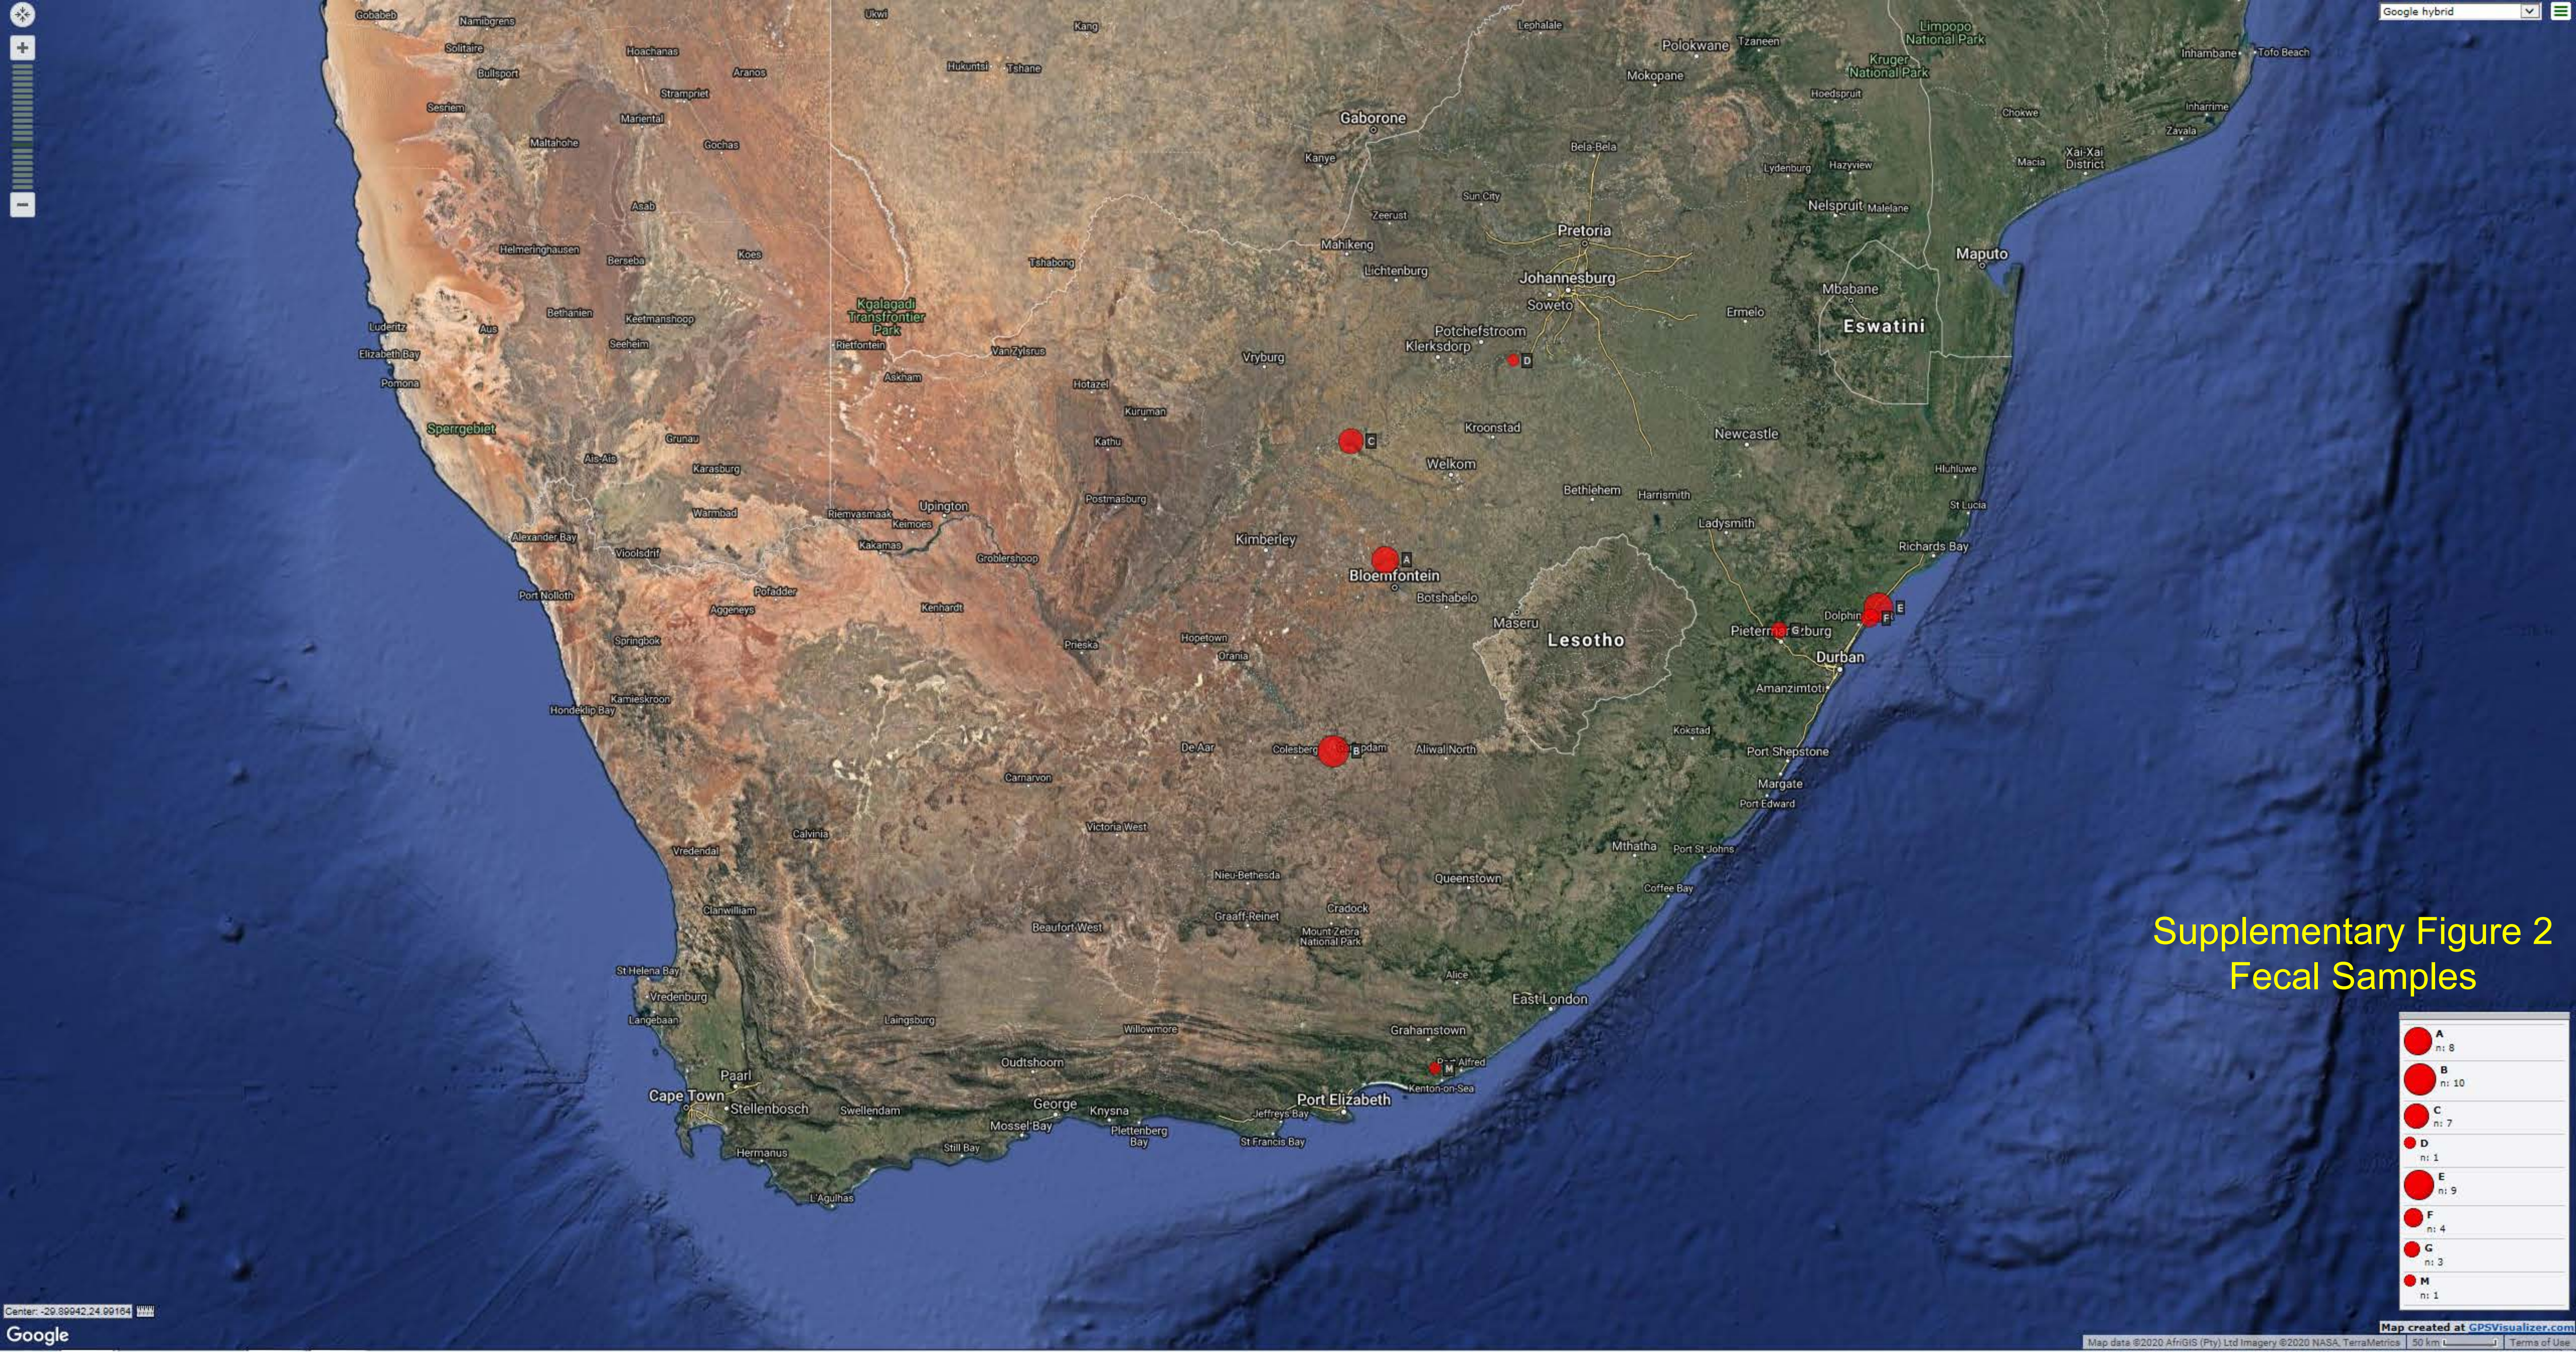

Supplementary Figure 2  
Fecal Samples

|       |          |
|-------|----------|
|       | <b>A</b> |
| n: 8  |          |
|       | <b>B</b> |
| n: 10 |          |
|       | <b>C</b> |
| n: 7  |          |
|       | <b>D</b> |
| n: 1  |          |
|       | <b>E</b> |
| n: 9  |          |
|       | <b>F</b> |
| n: 4  |          |
|       | <b>G</b> |
| n: 3  |          |
|       | <b>M</b> |
| n: 1  |          |



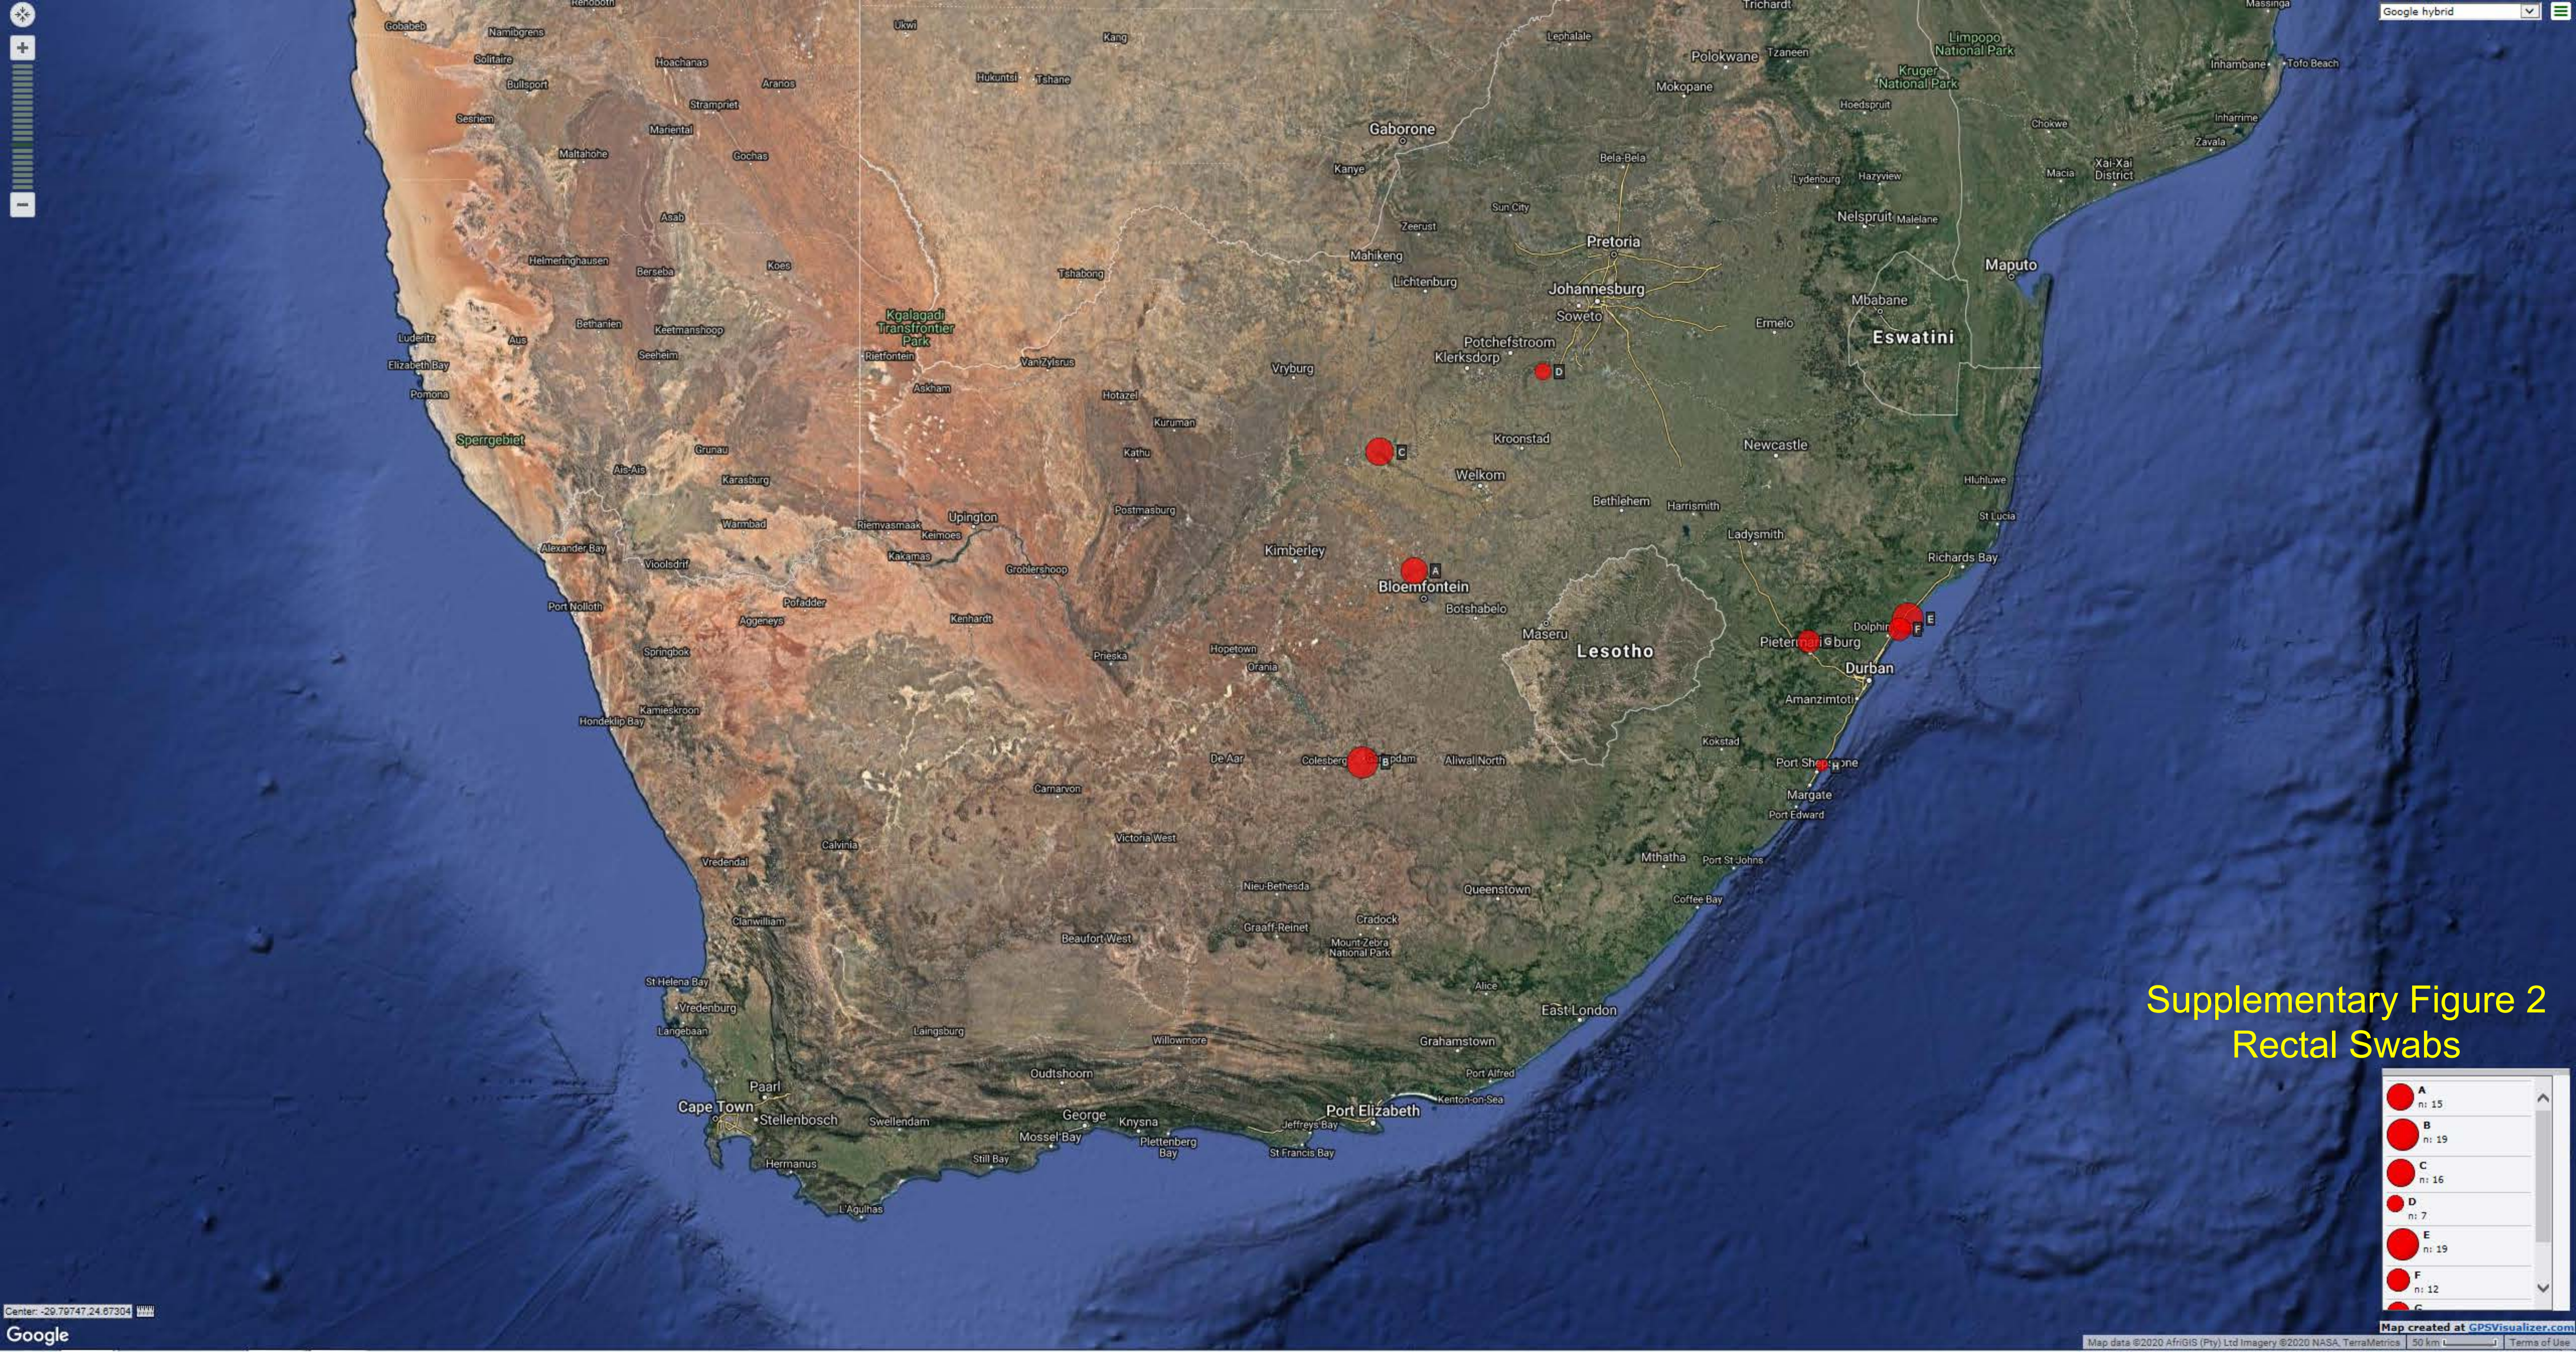

Supplementary Figure 2  
Rectal Swabs

|     |       |
|-----|-------|
| ● A | n: 15 |
| ● B | n: 19 |
| ● C | n: 16 |
| ● D | n: 7  |
| ● E | n: 19 |
| ● F | n: 12 |



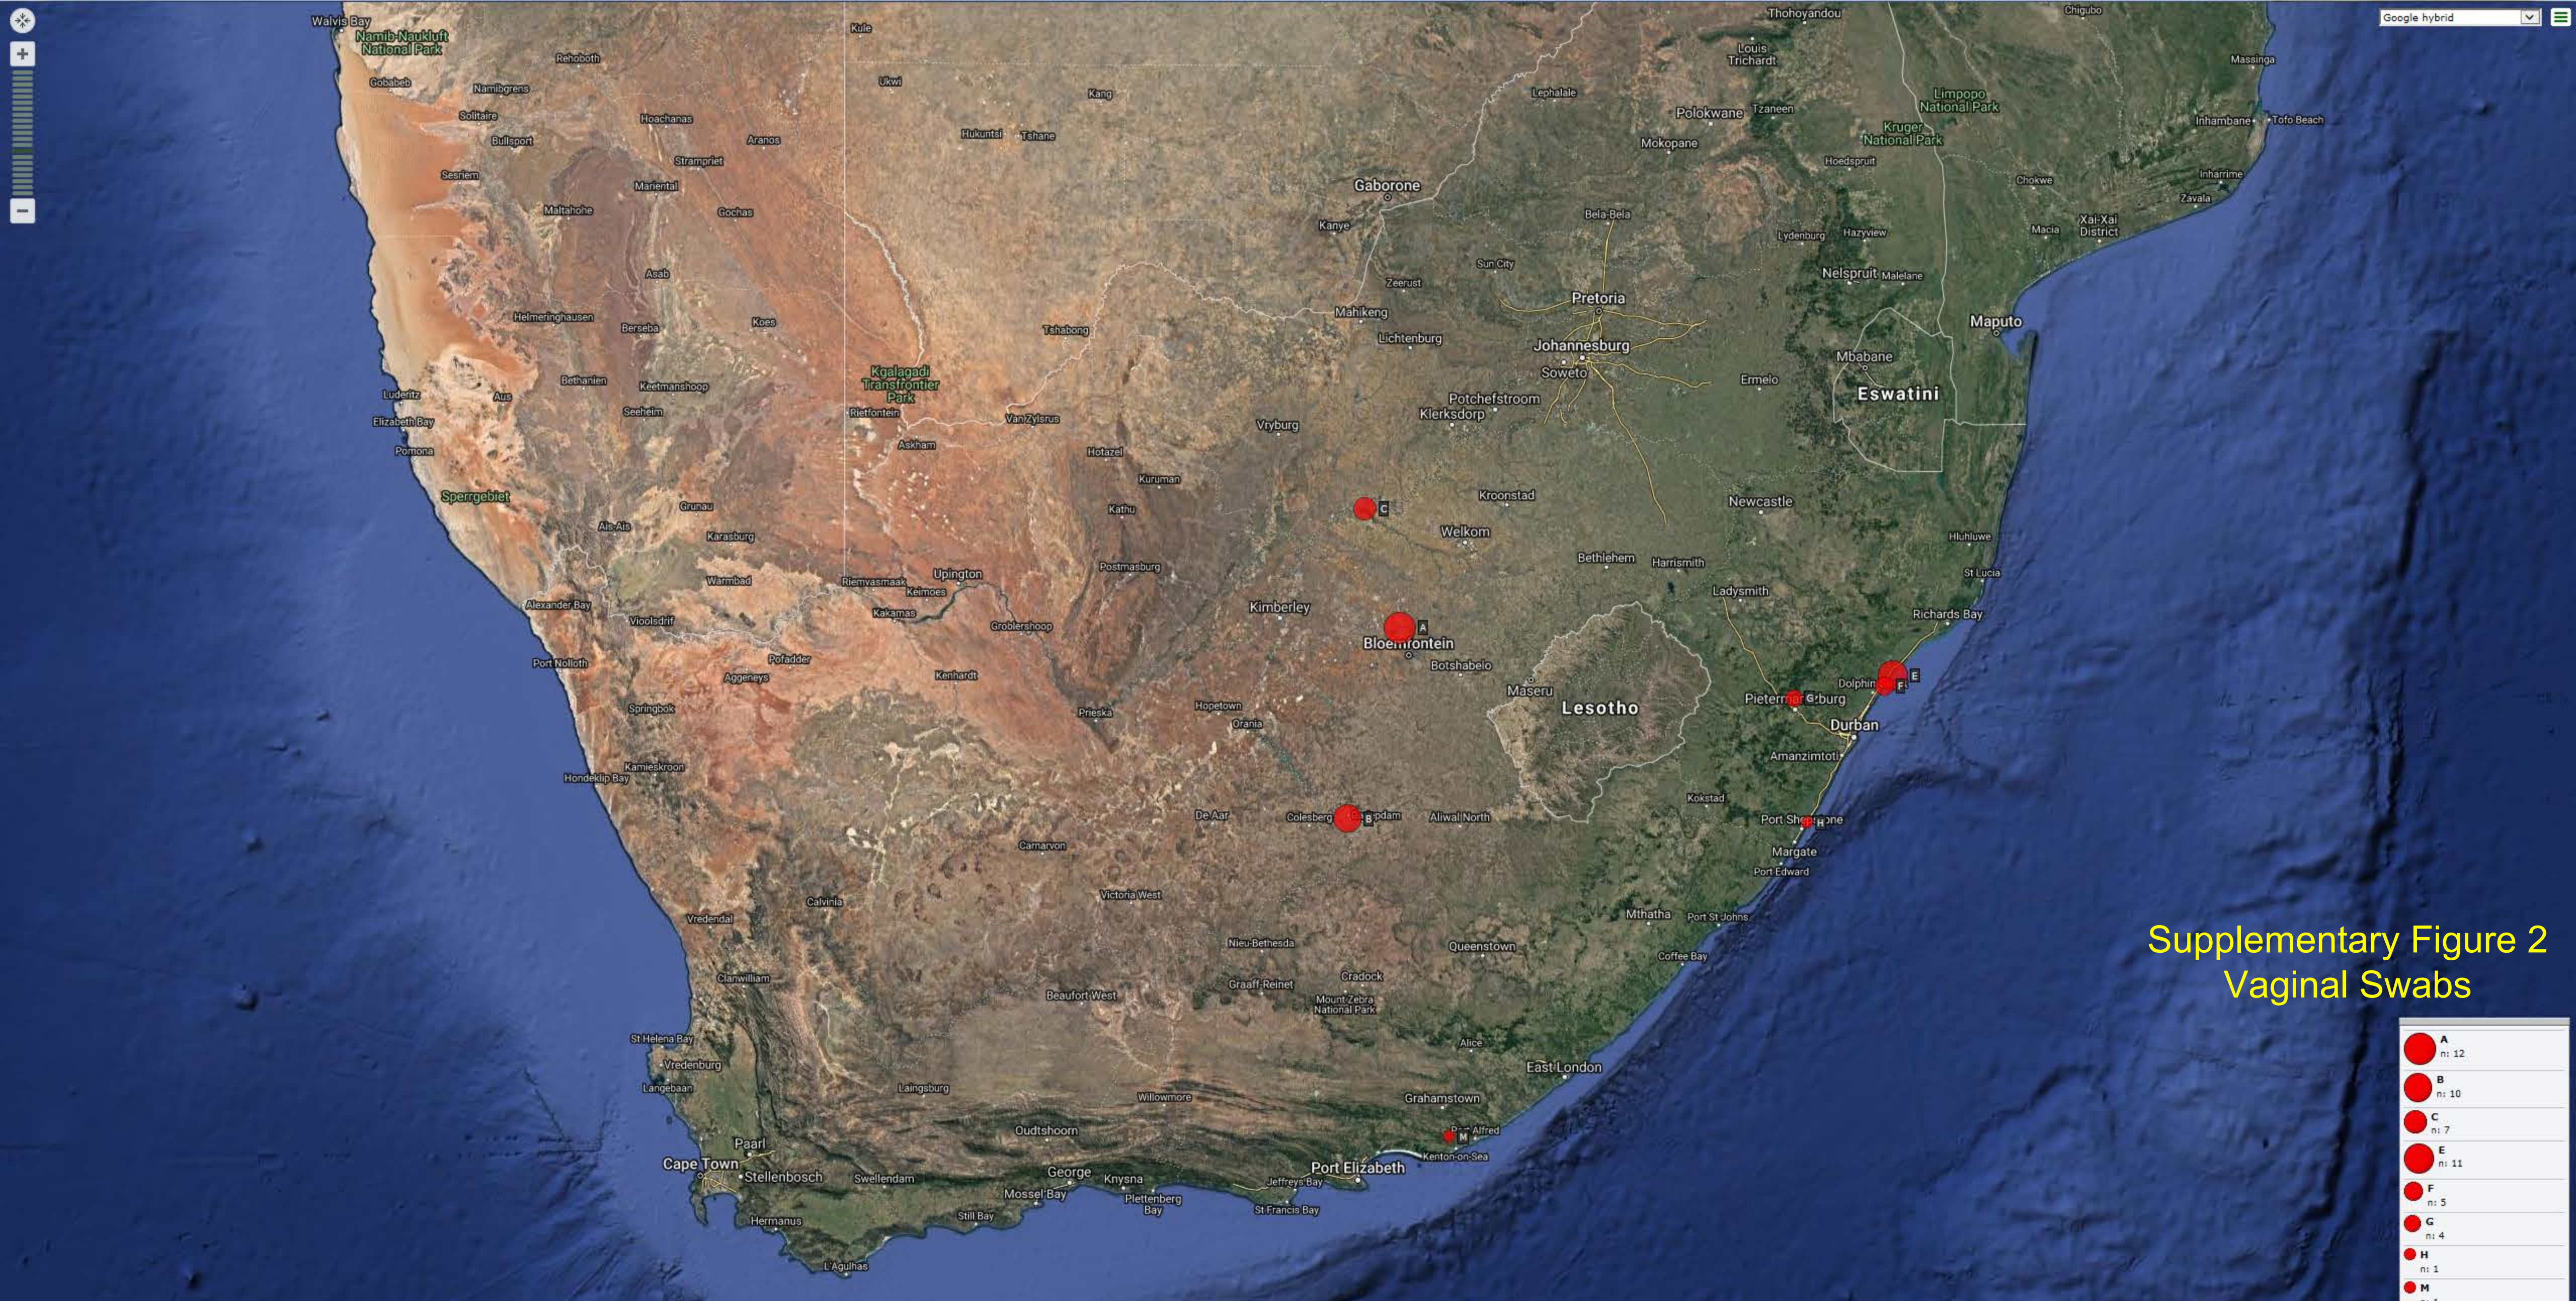

Supplementary Figure 2  
Vaginal Swabs

|                                                       |       |
|-------------------------------------------------------|-------|
| <span style="color: red; font-size: 20px;">●</span> A | n: 12 |
| <span style="color: red; font-size: 18px;">●</span> B | n: 10 |
| <span style="color: red; font-size: 16px;">●</span> C | n: 7  |
| <span style="color: red; font-size: 22px;">●</span> E | n: 11 |
| <span style="color: red; font-size: 14px;">●</span> F | n: 5  |
| <span style="color: red; font-size: 12px;">●</span> G | n: 4  |
| <span style="color: red; font-size: 10px;">●</span> H | n: 1  |
| <span style="color: red; font-size: 10px;">●</span> M | n: 1  |



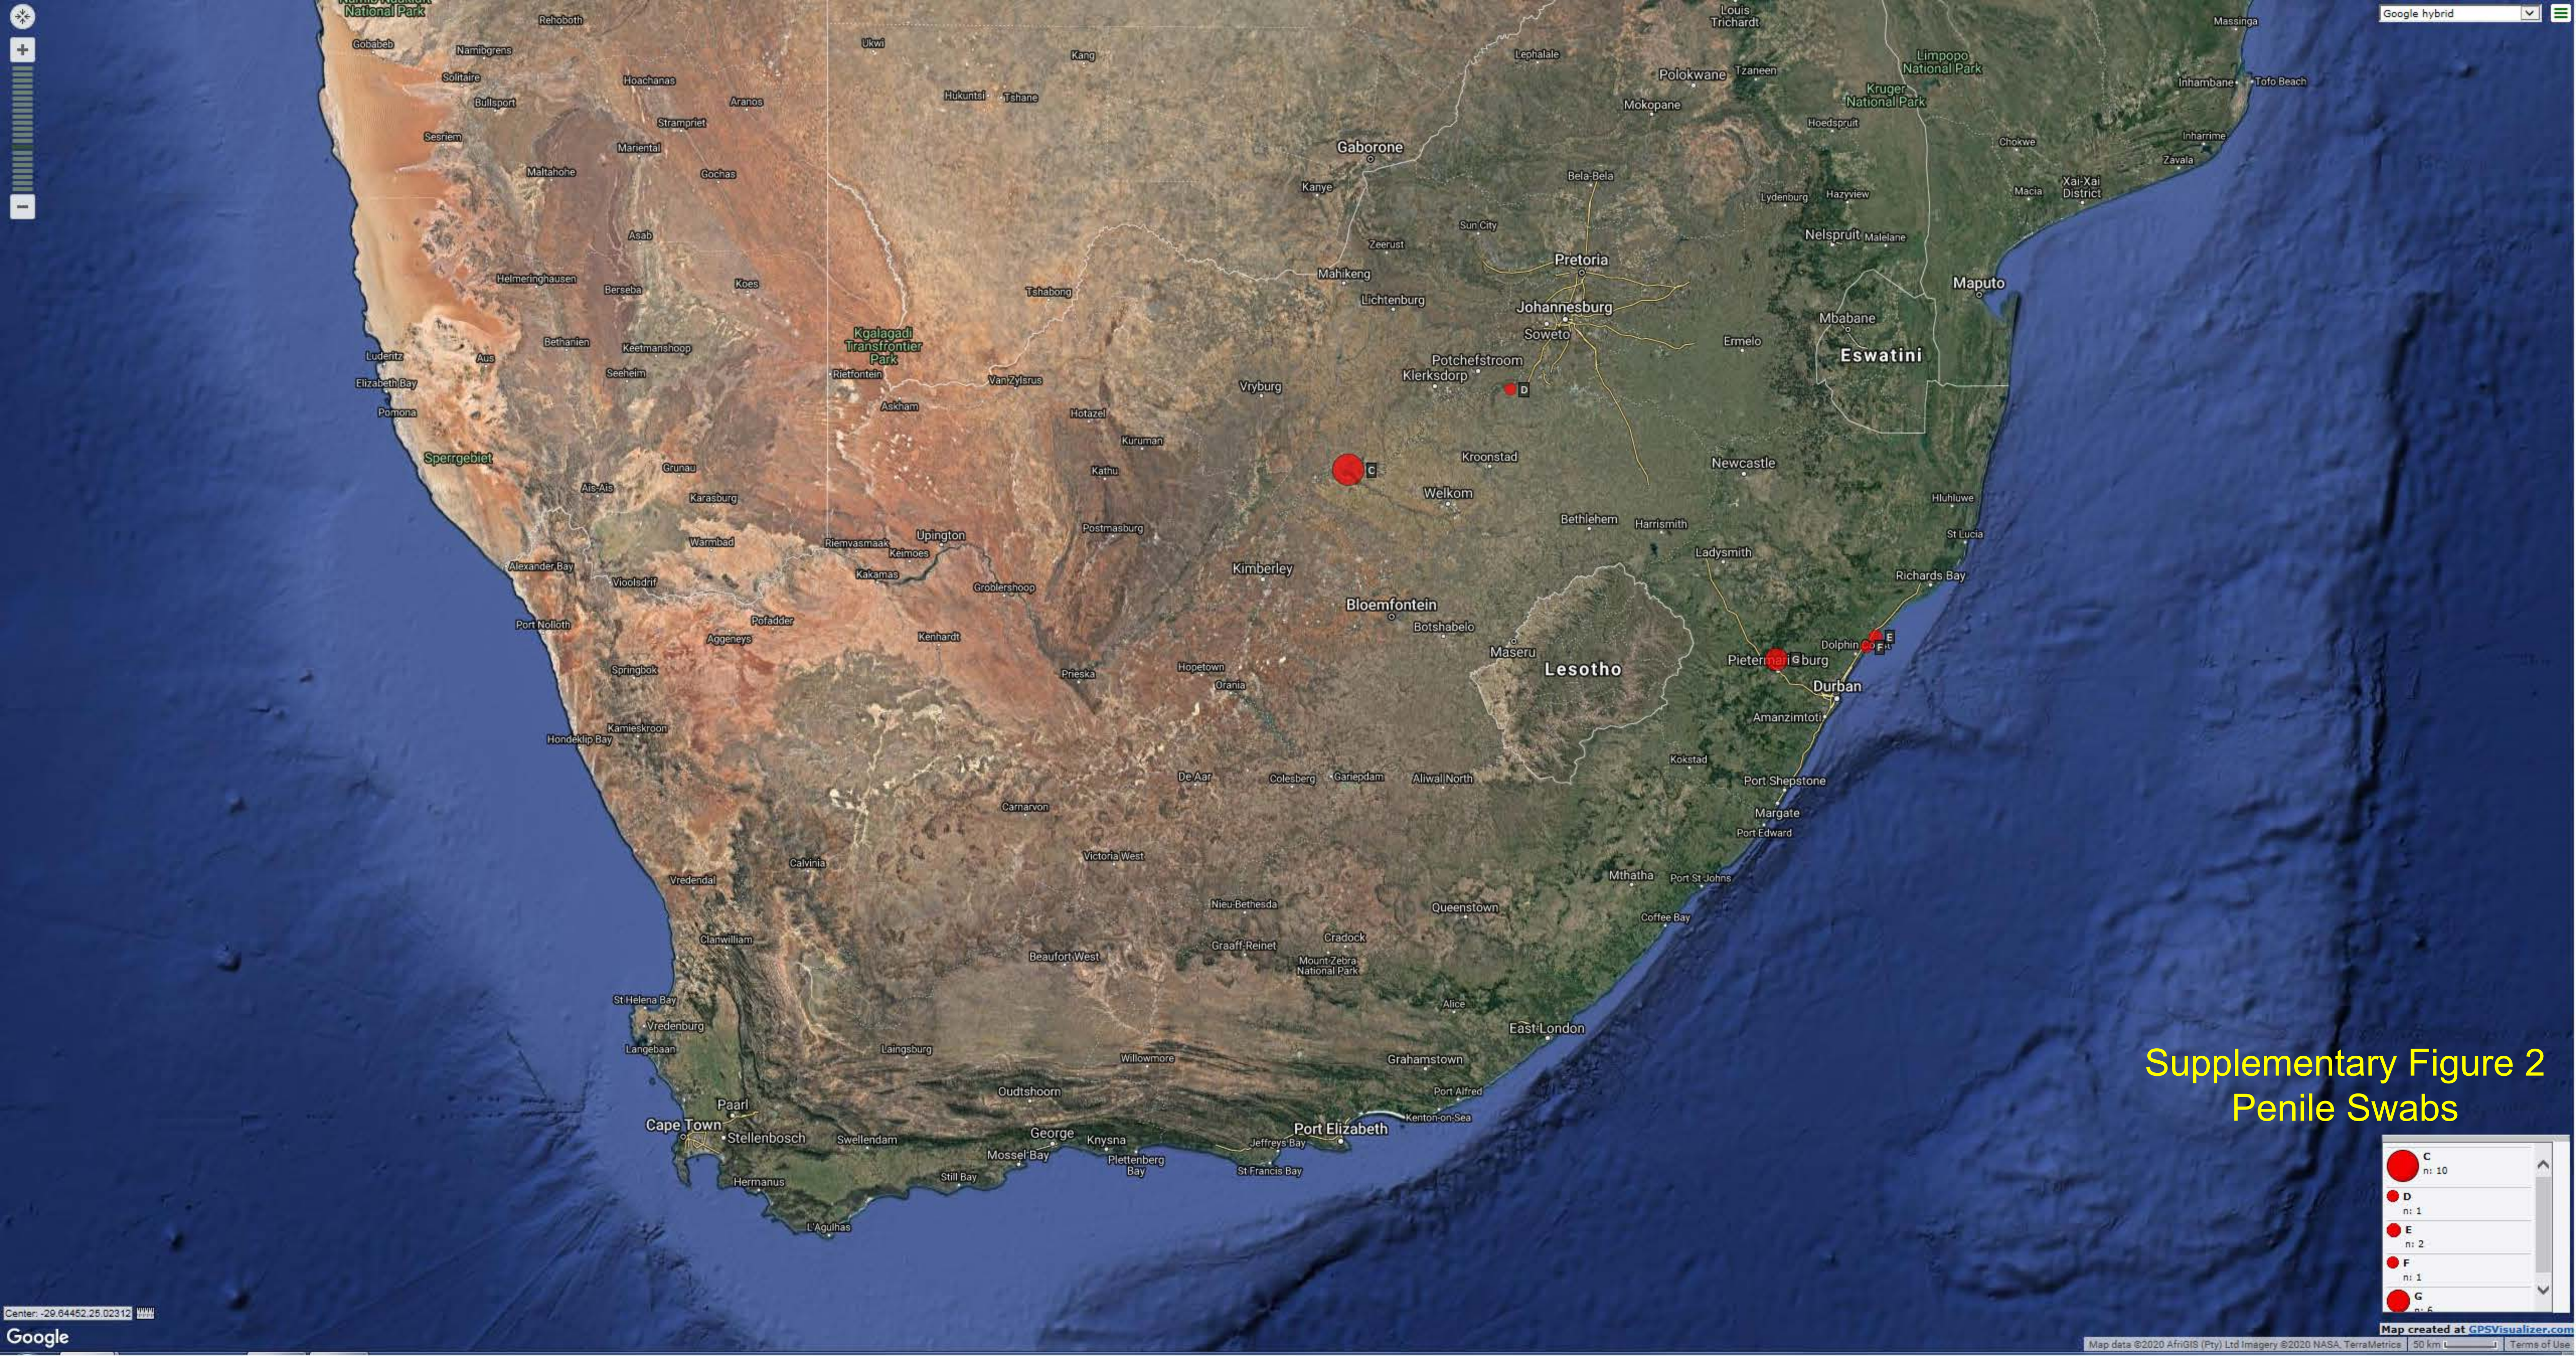

Supplementary Figure 2  
Penile Swabs

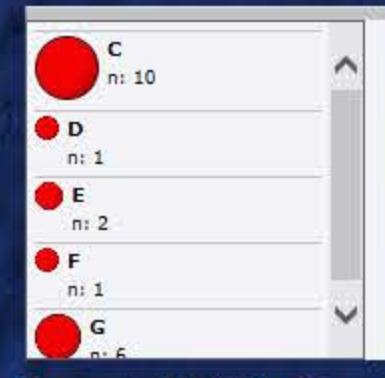







# Supplementary Figure 4

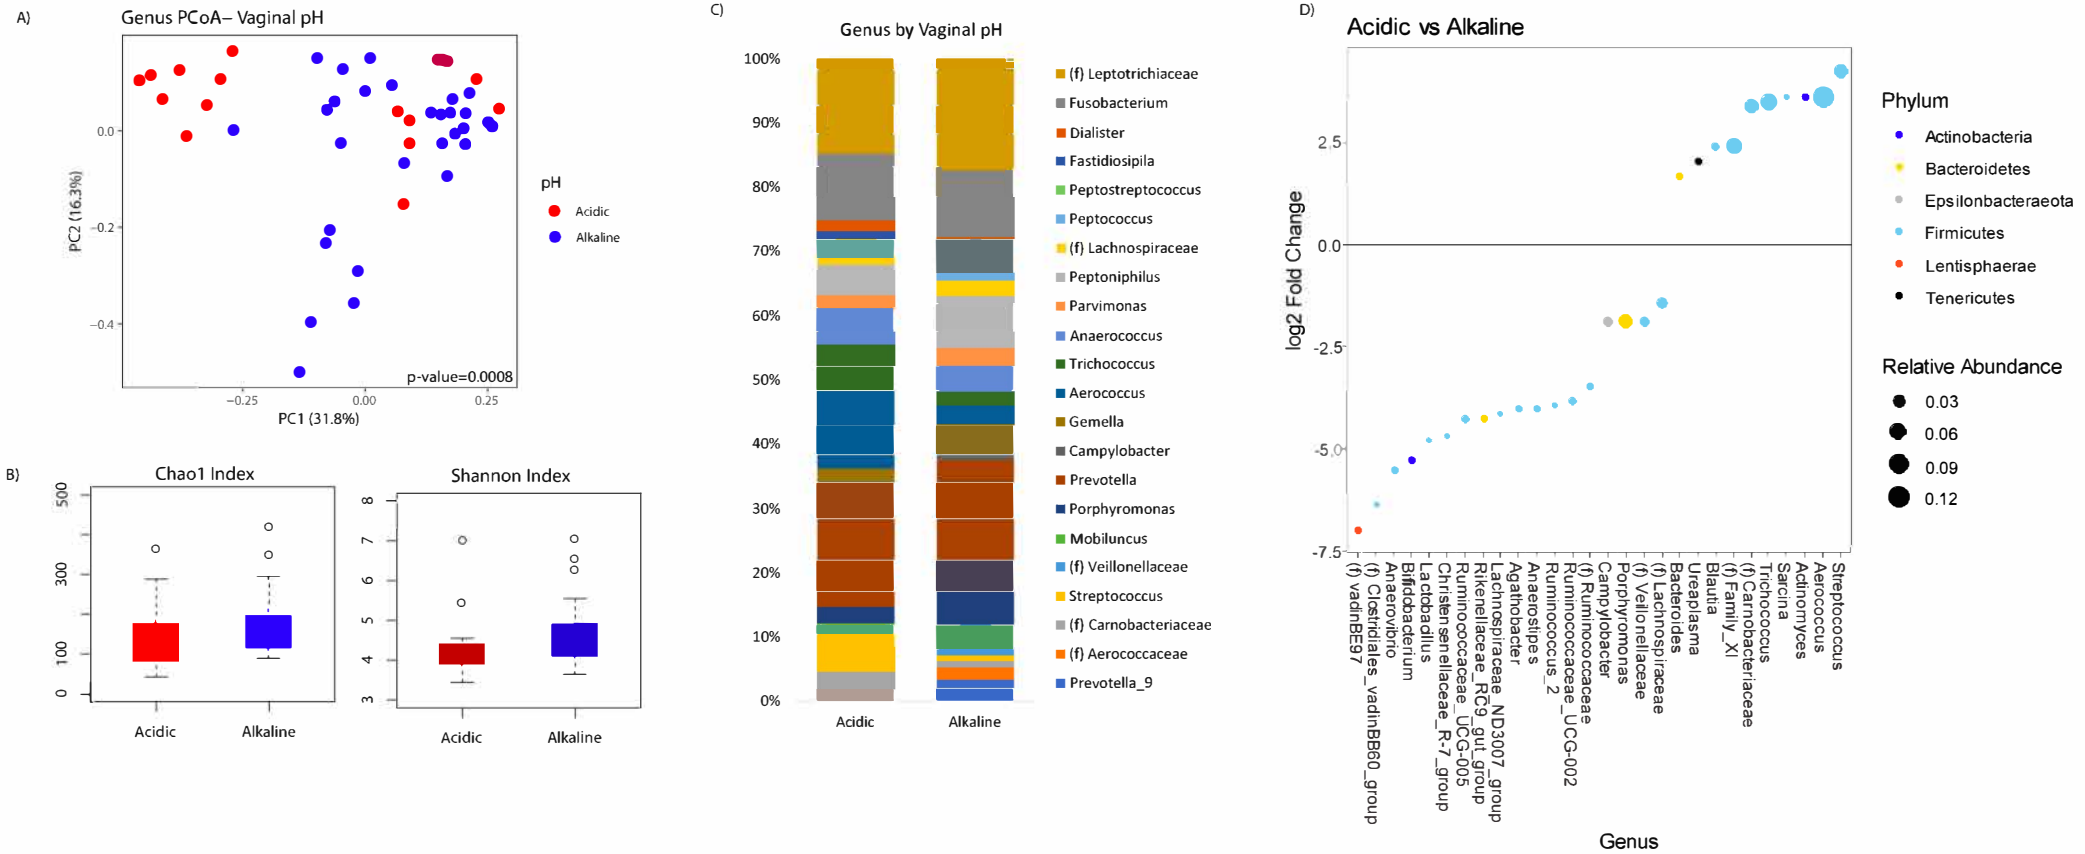



# Supplementary Figure 5

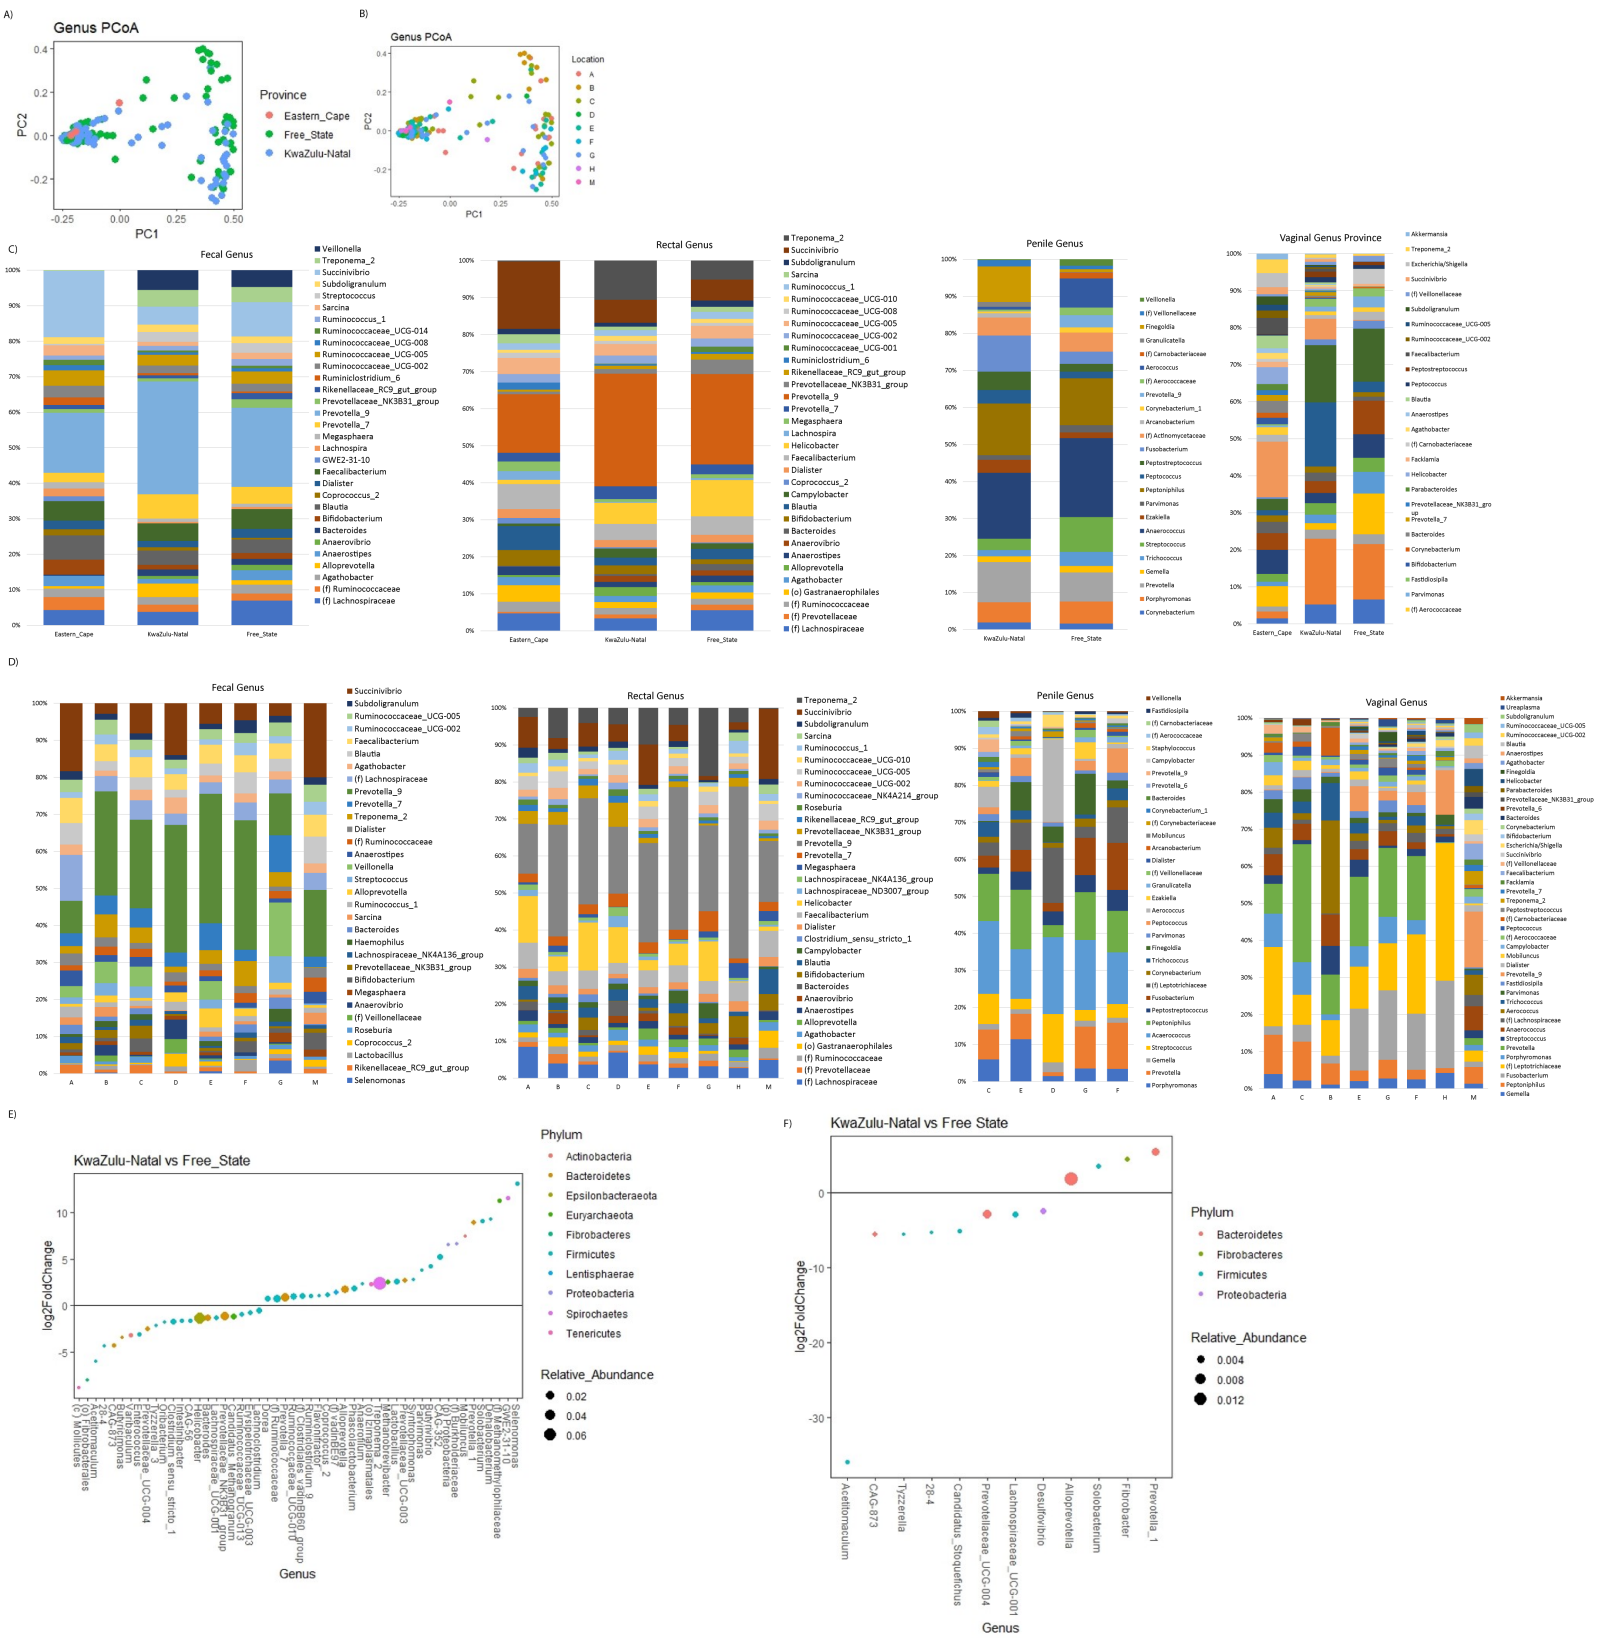



Supplementary Figure 6

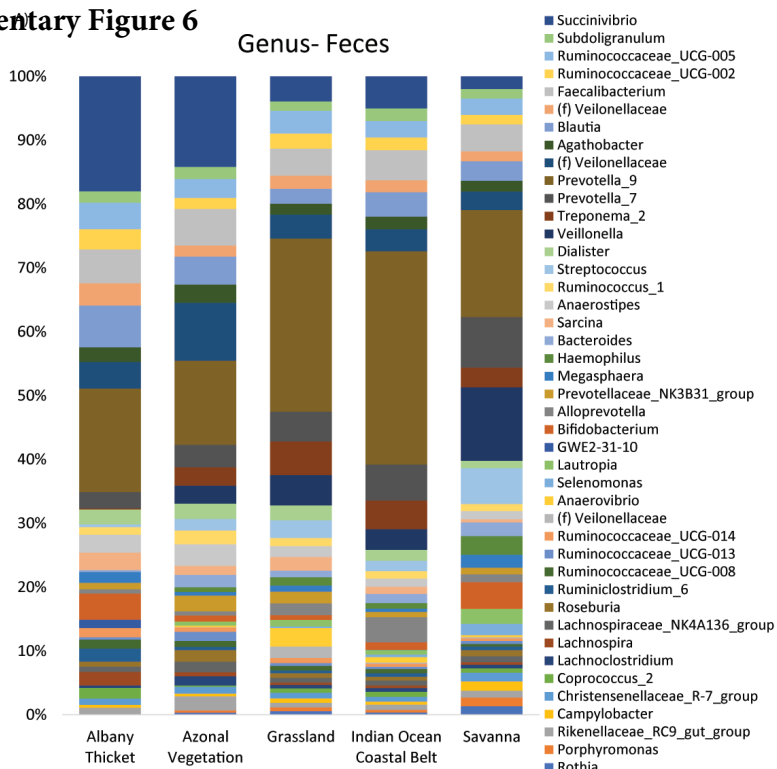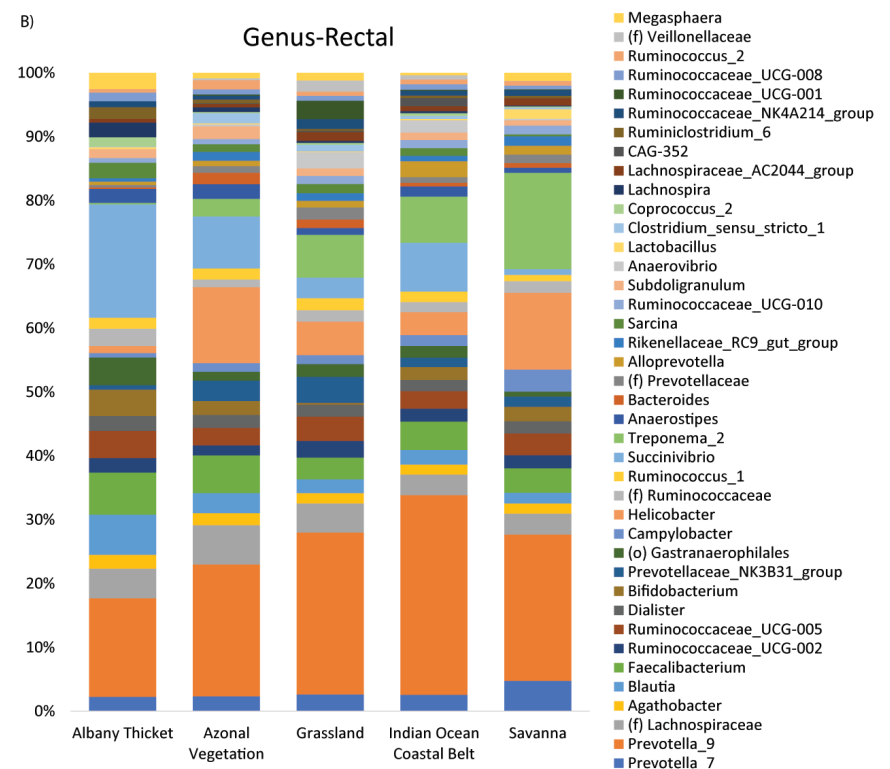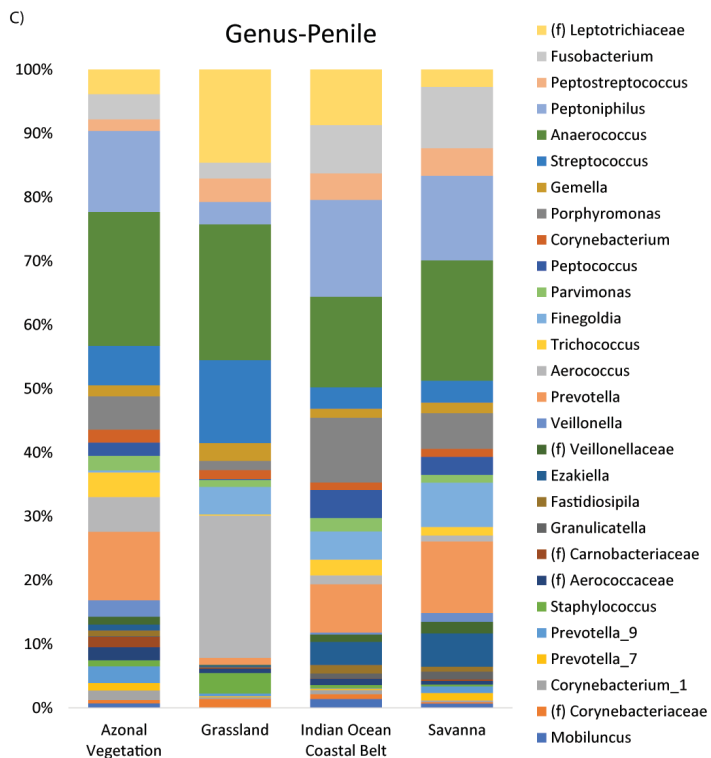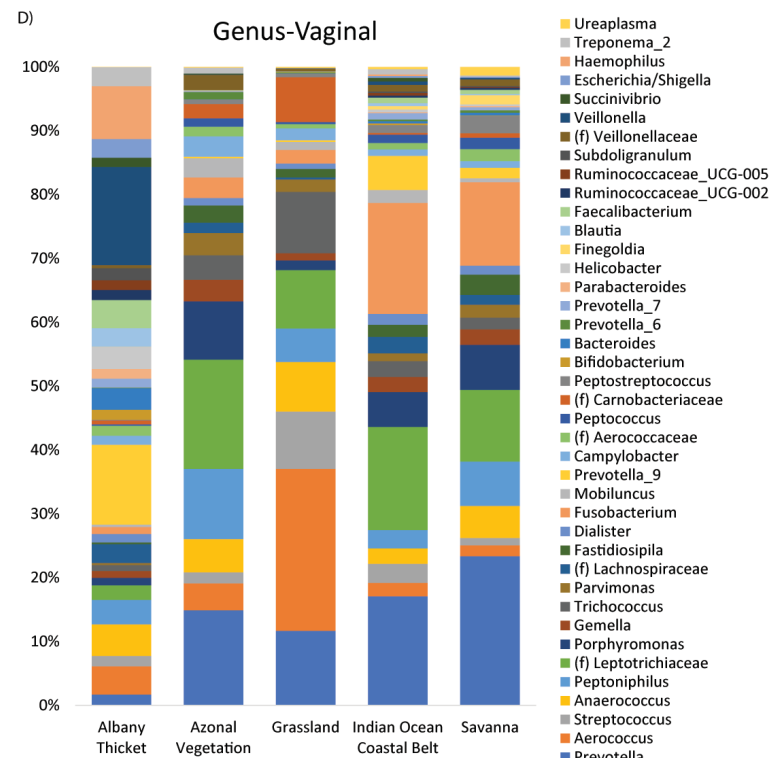



# Supplementary Figure 7

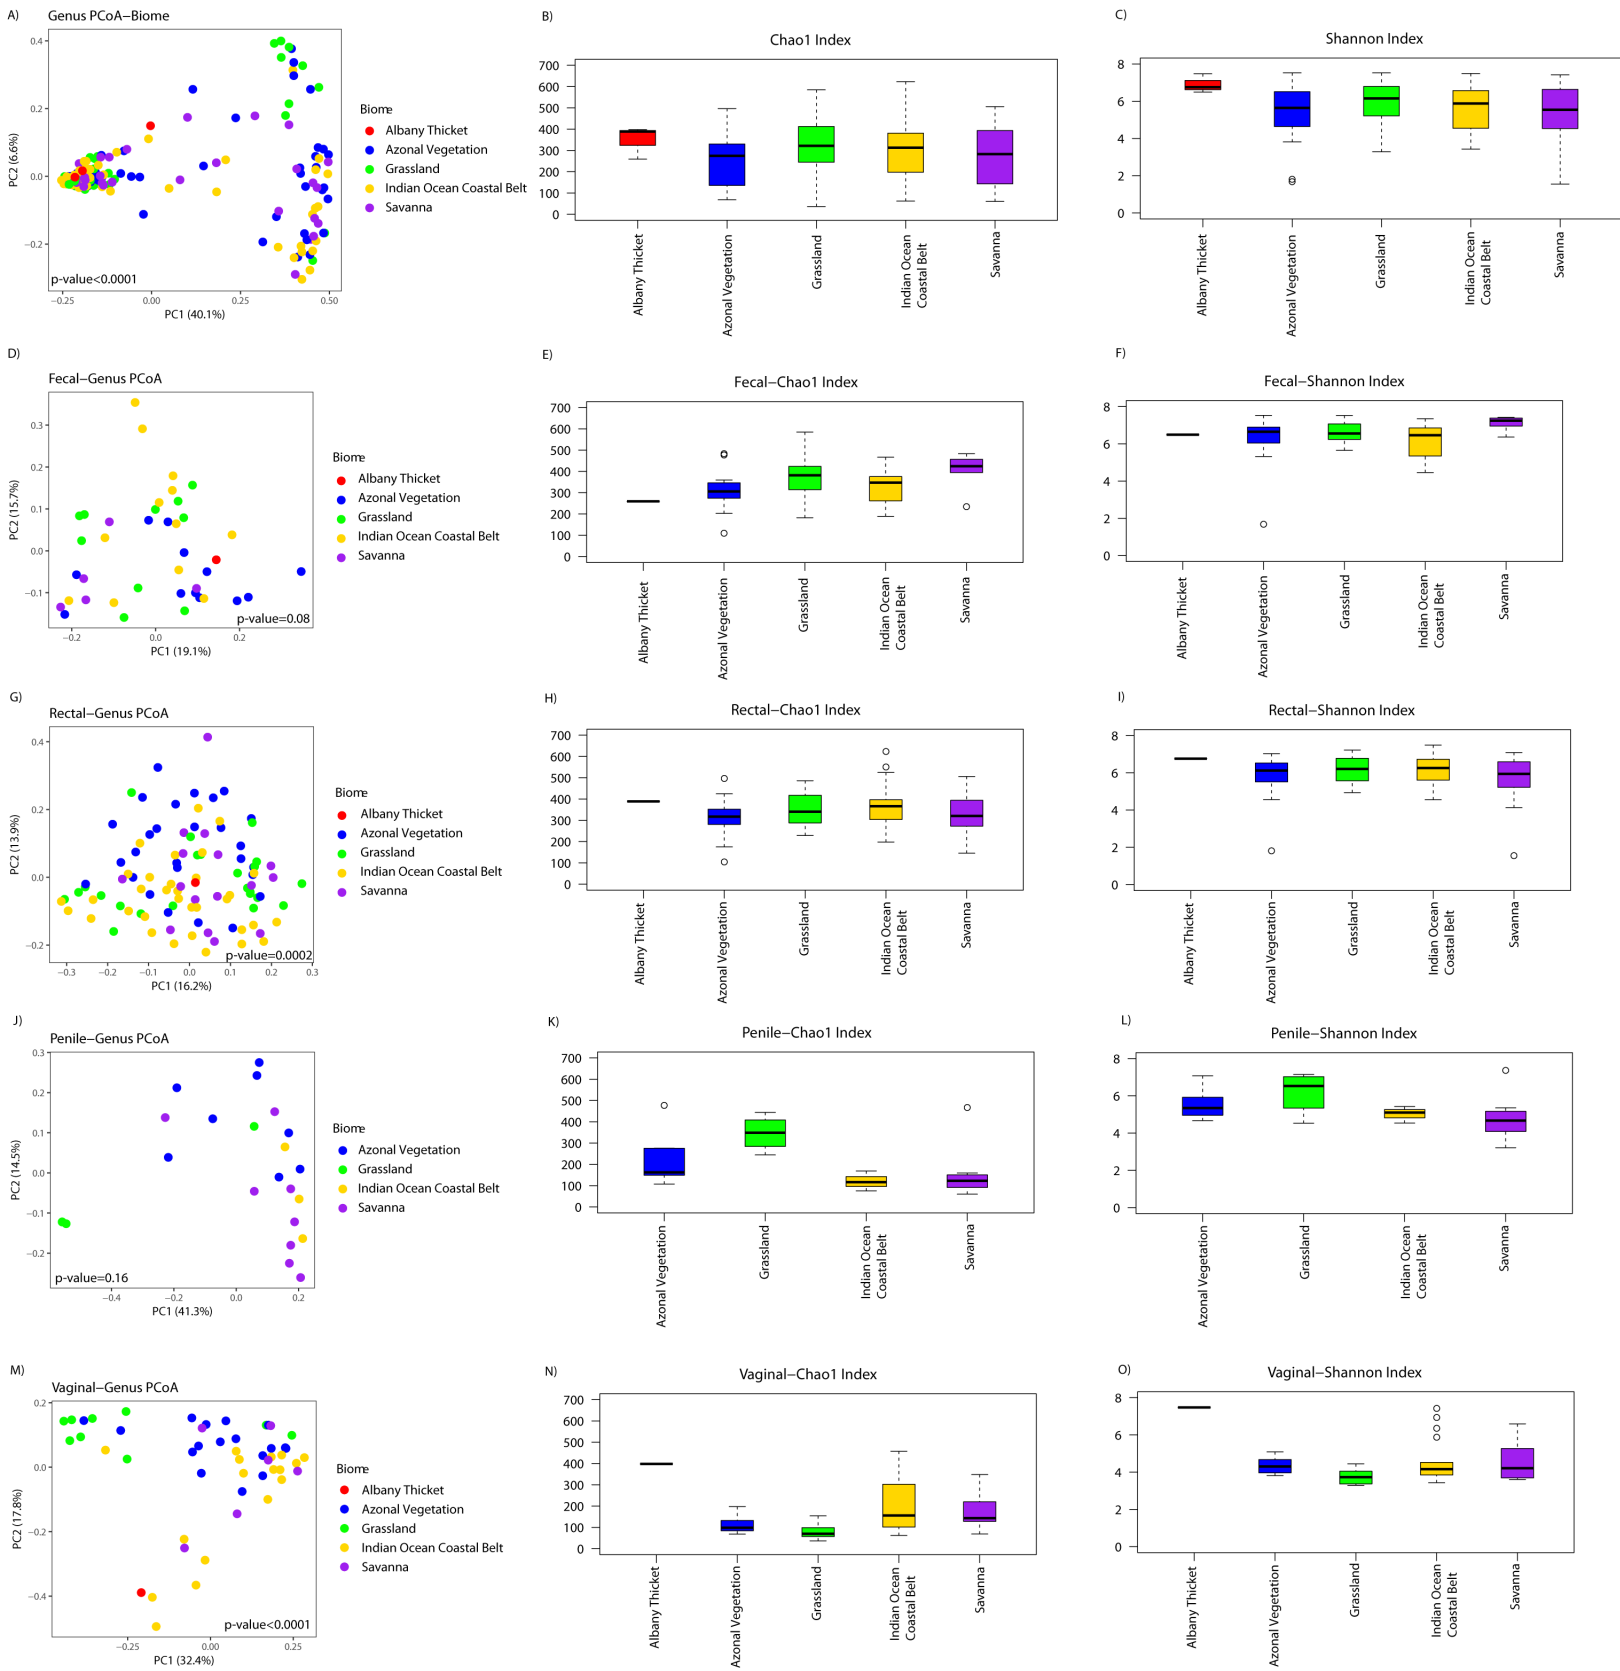



# Supplementary Figure 8

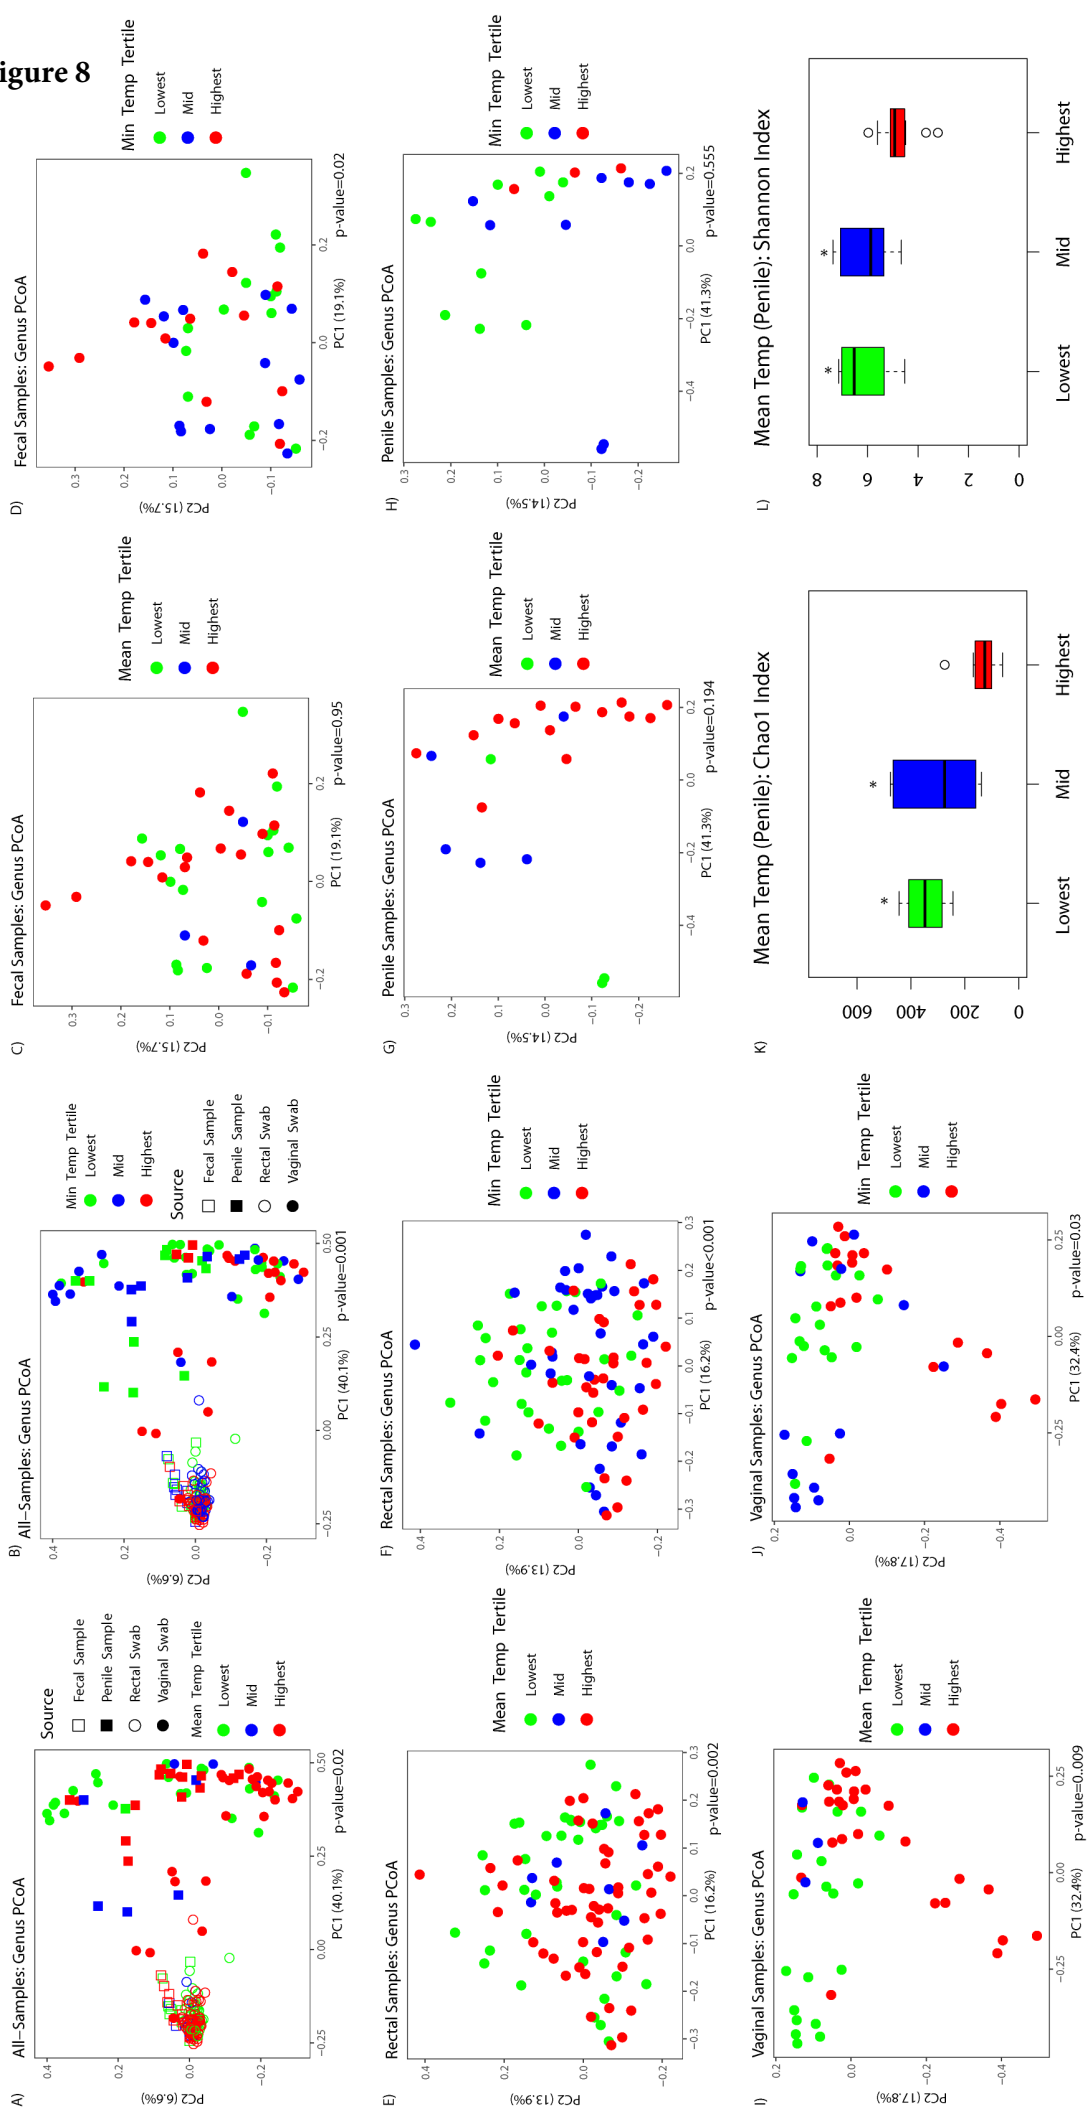



# Supplementary Figure 9

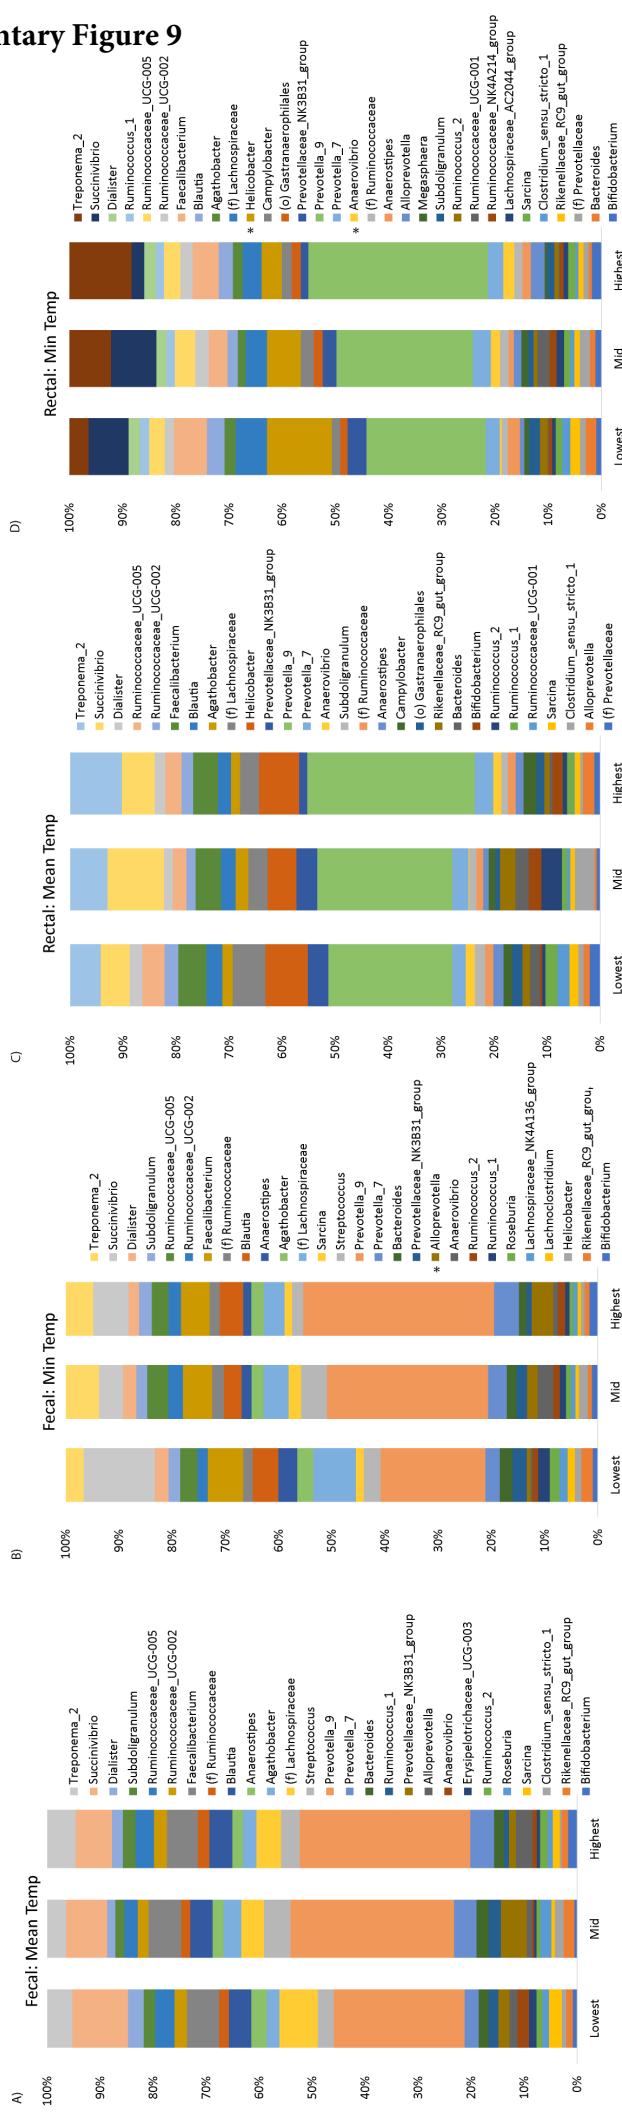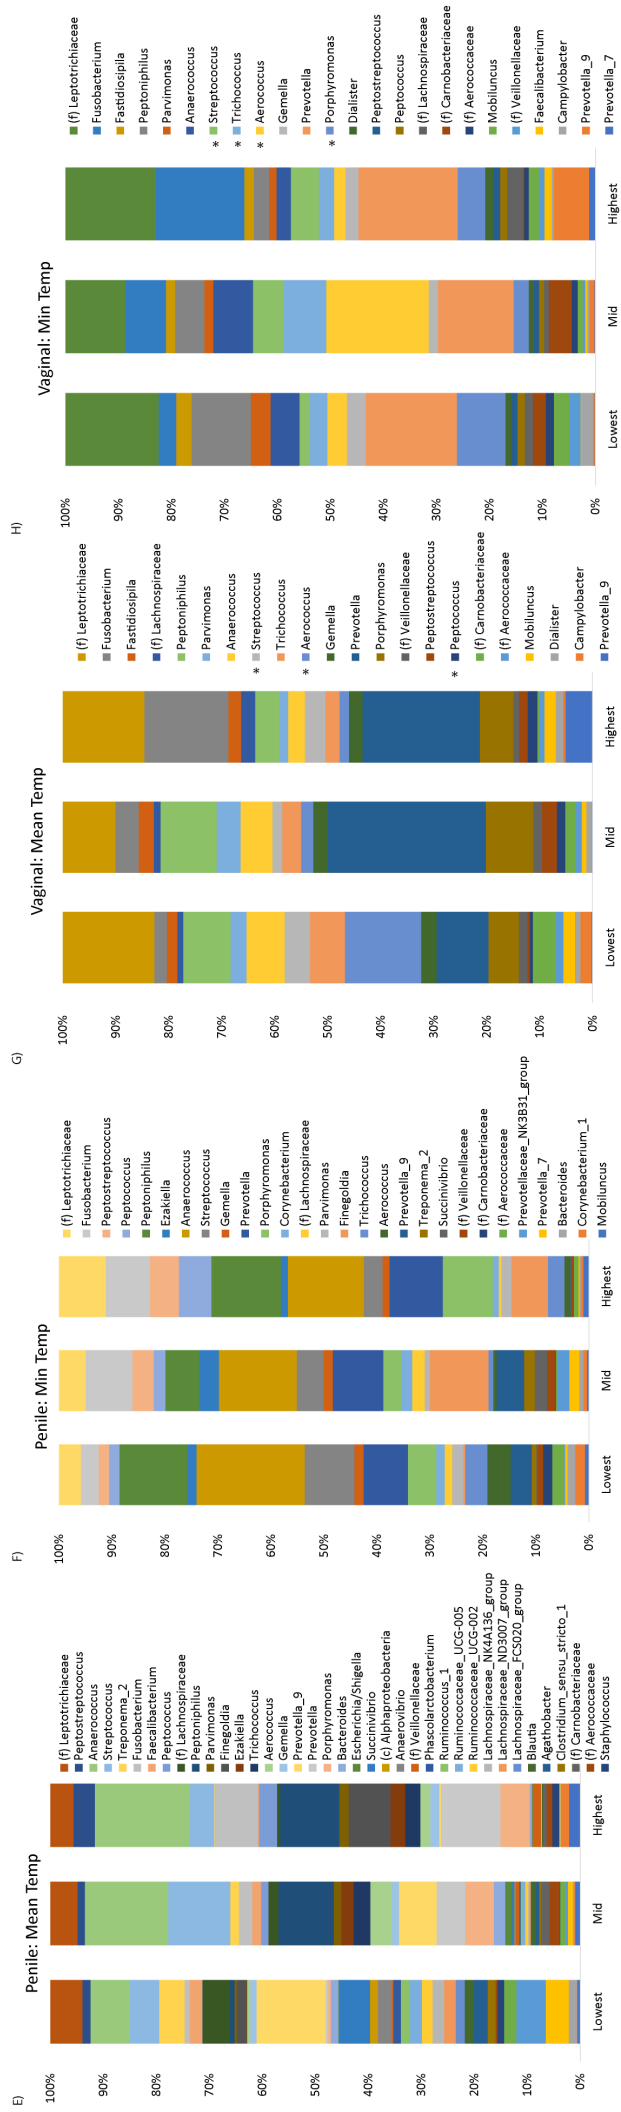



B)

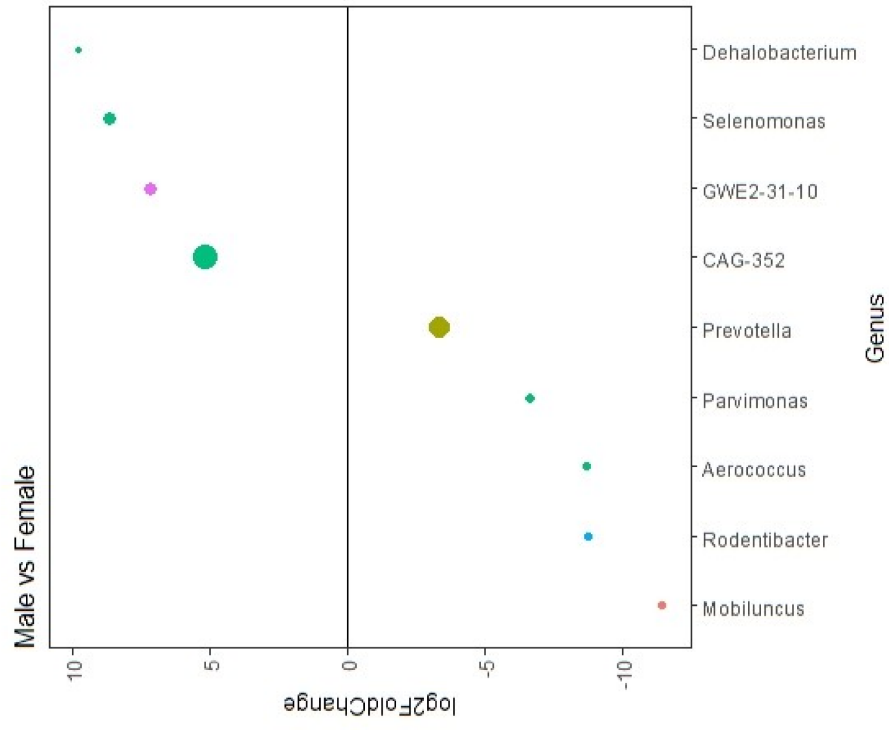

A)

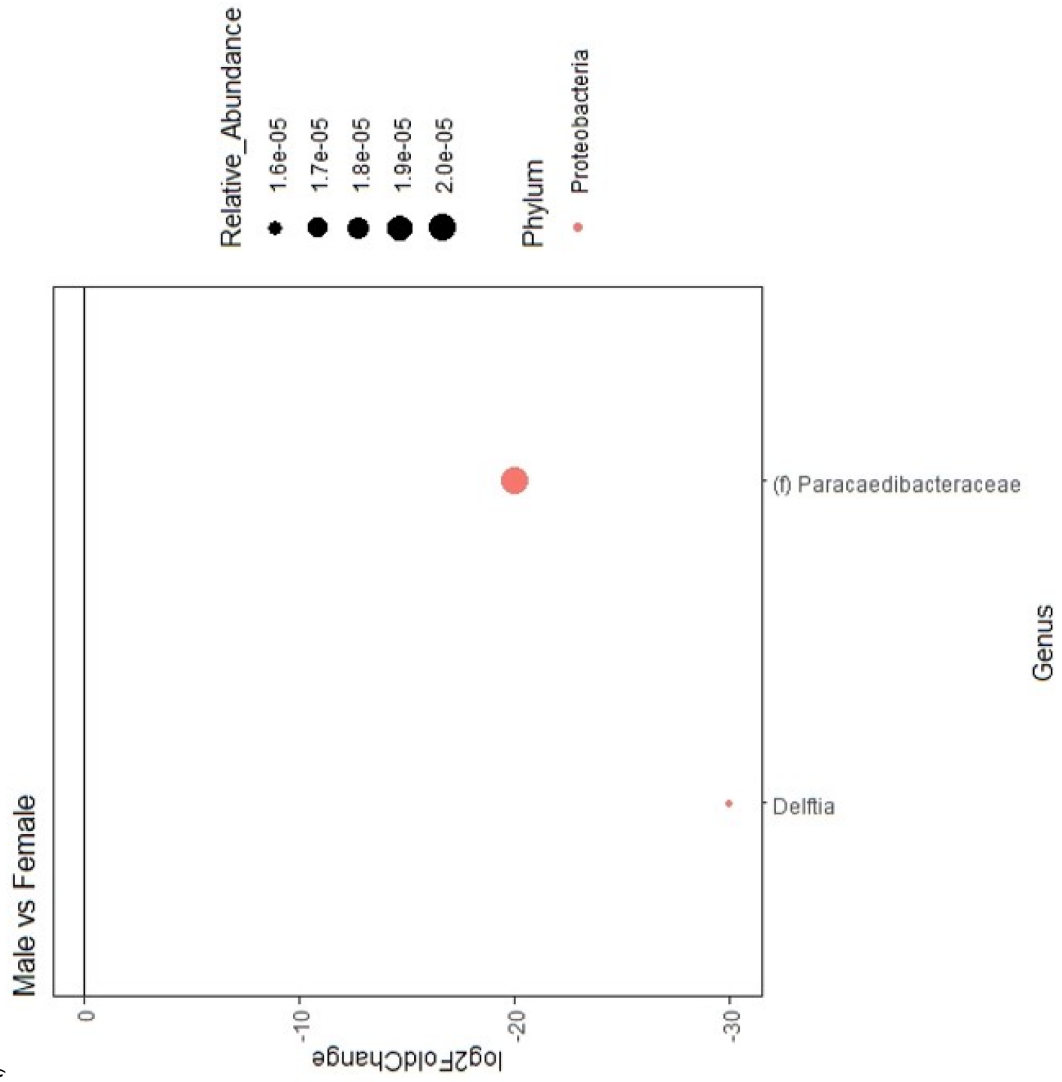



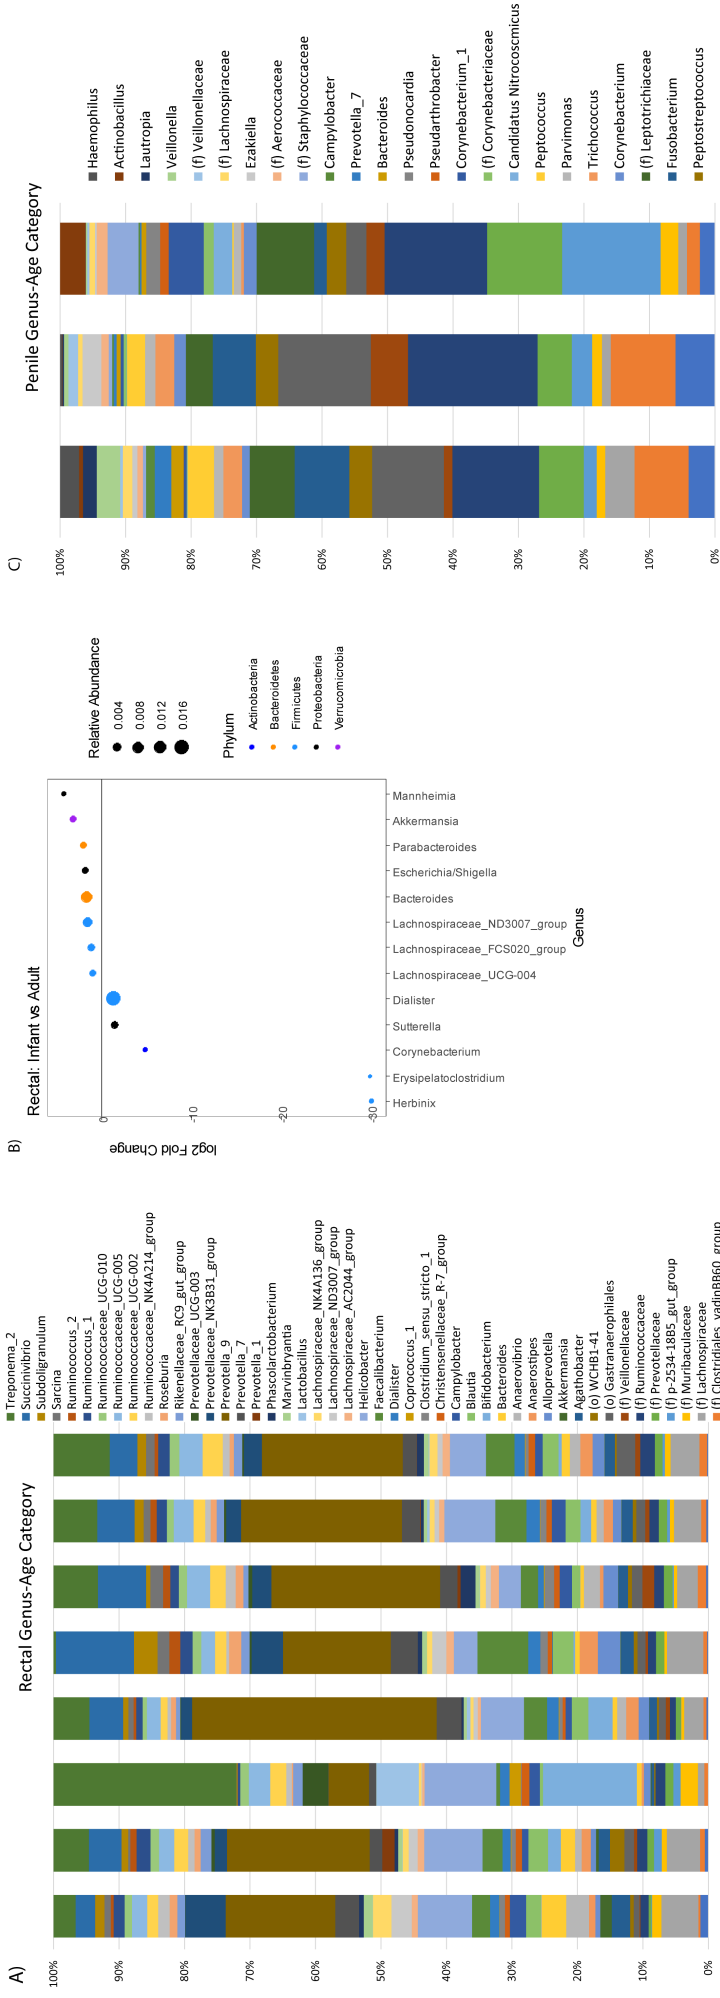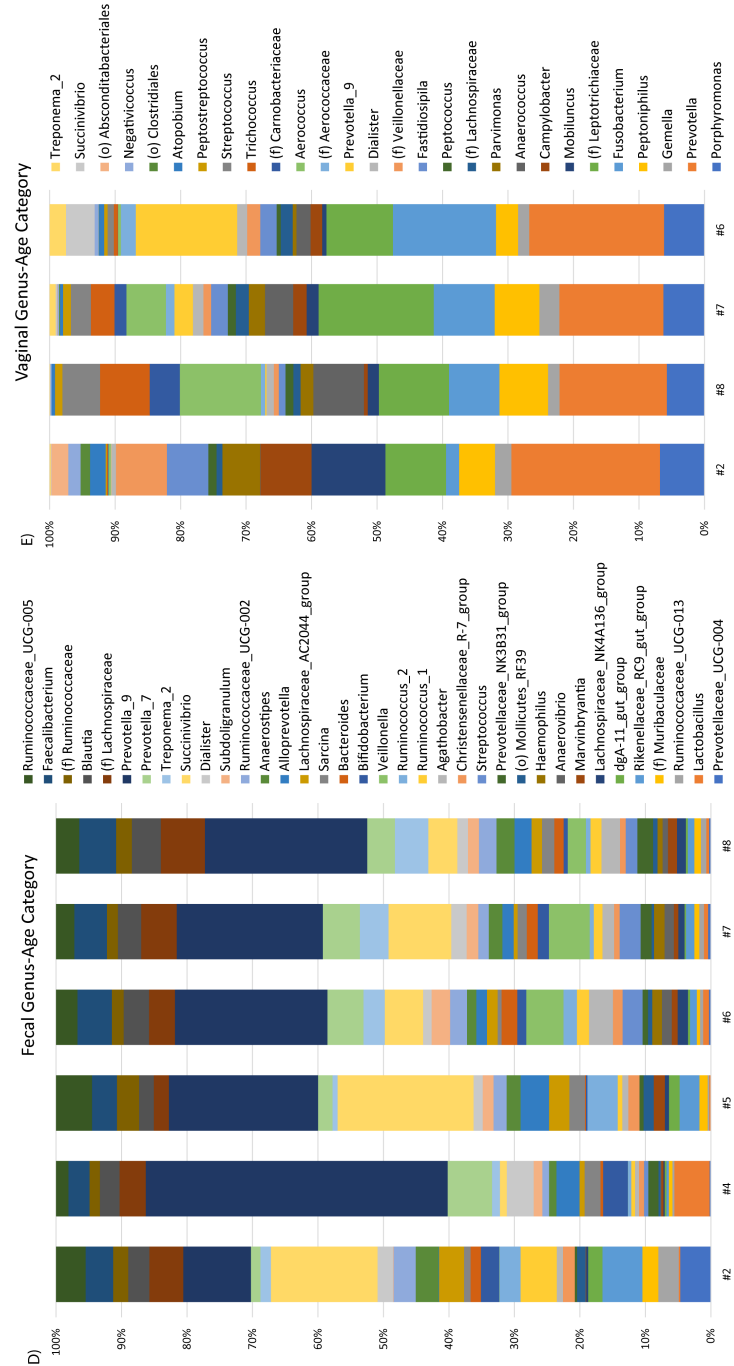



Color Key

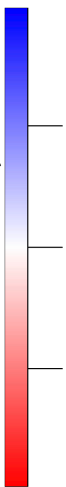

-0.5 0 0.5

Value

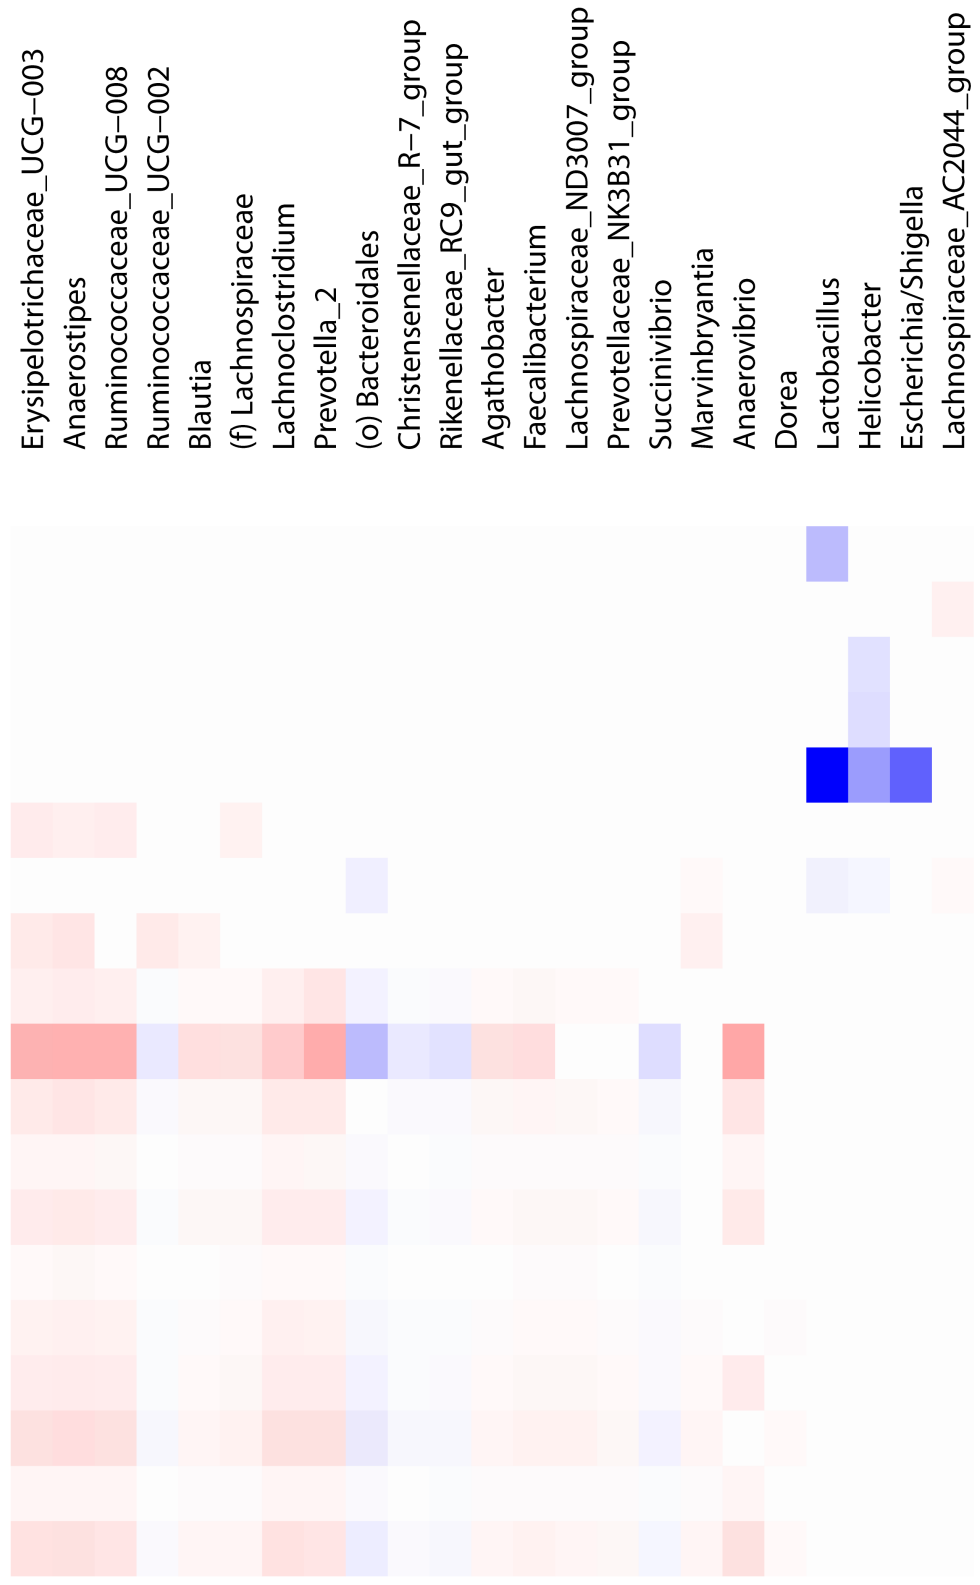

FGF  
HGF  
GMCSF  
IL1RA  
IL2  
IL5  
EGF  
MIP1a  
MIP1b  
IL10  
IL15  
IFNγ  
IL12  
IL4  
MIG  
IL6  
IL17  
MDC  
VEGF



Supplementary Figure 13

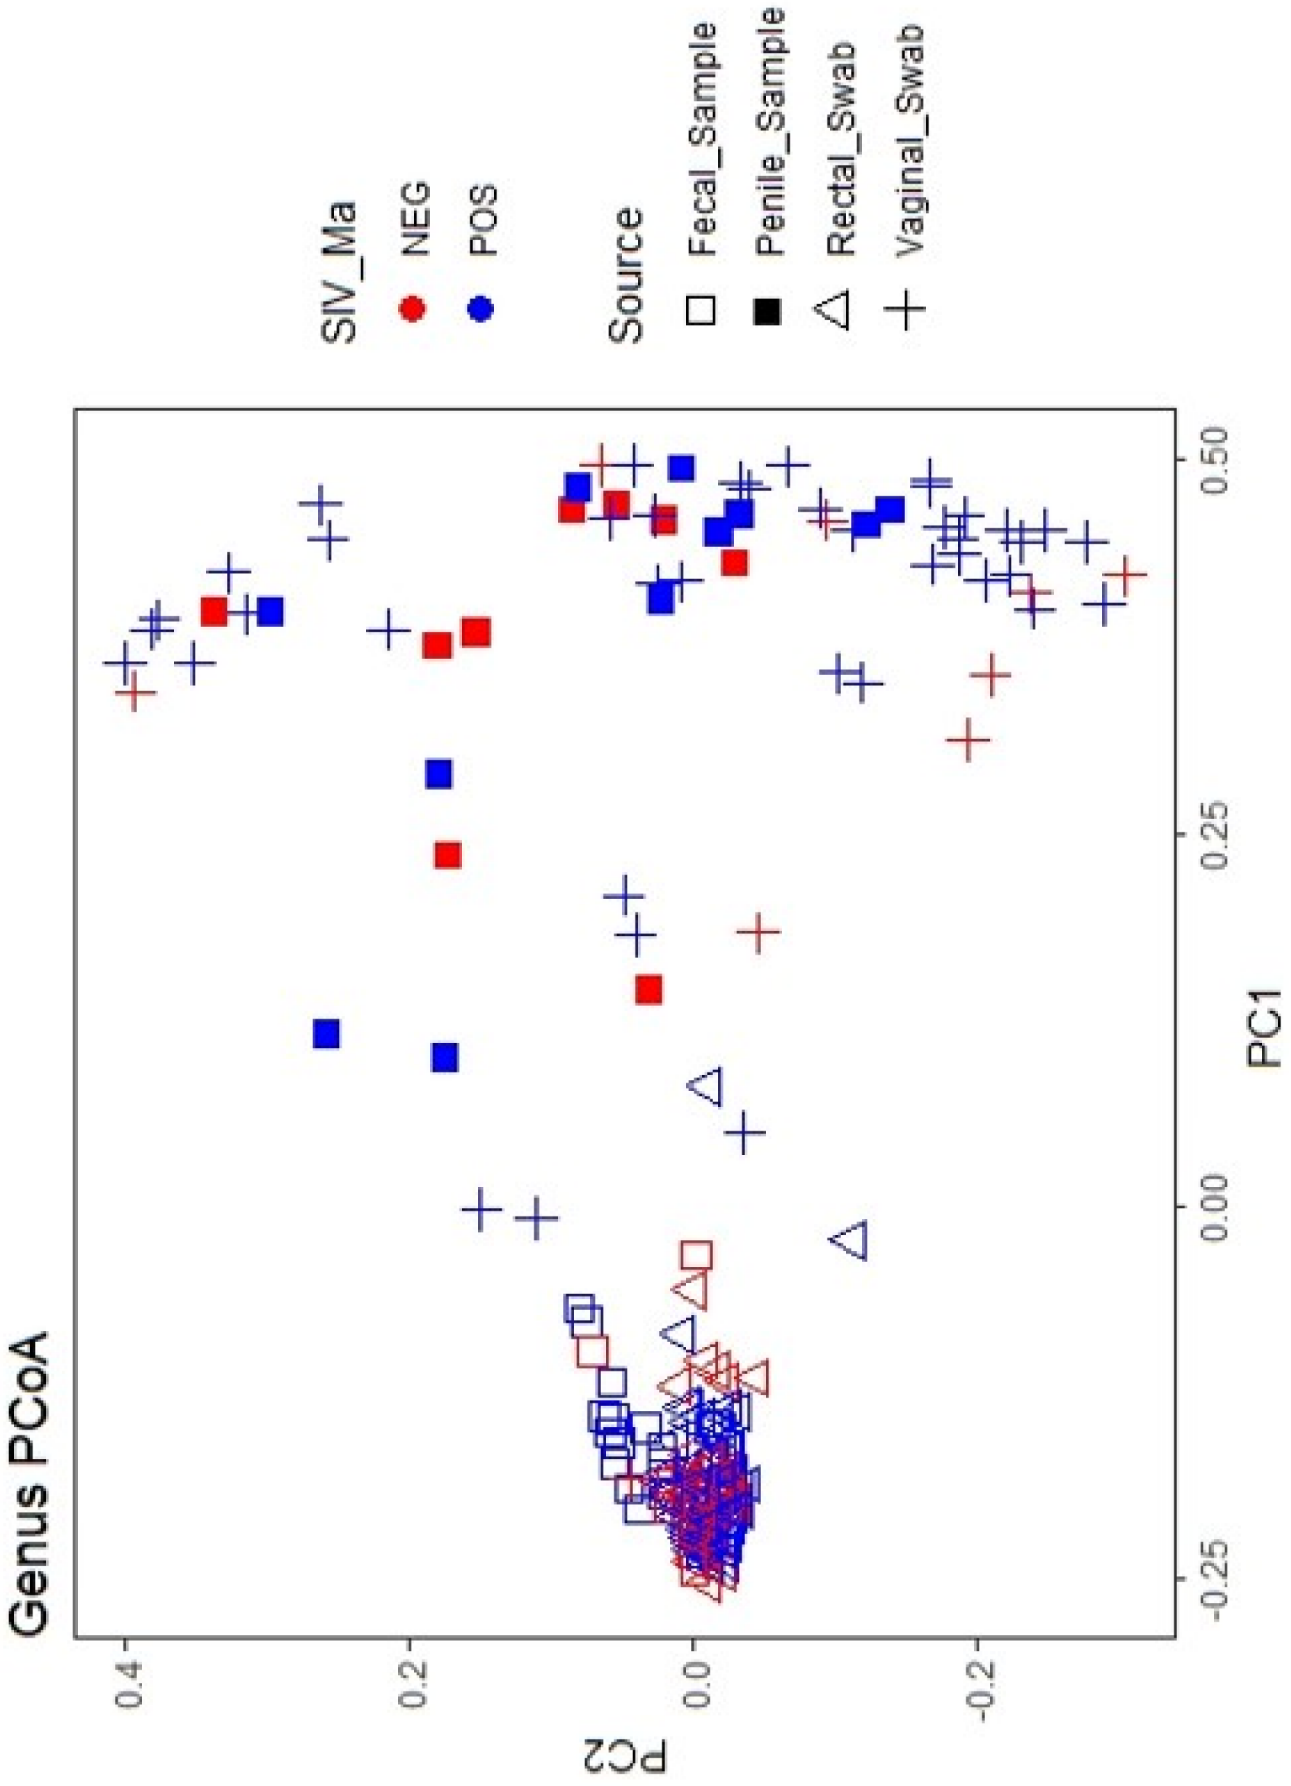



Fecal: Chronic vs Acute

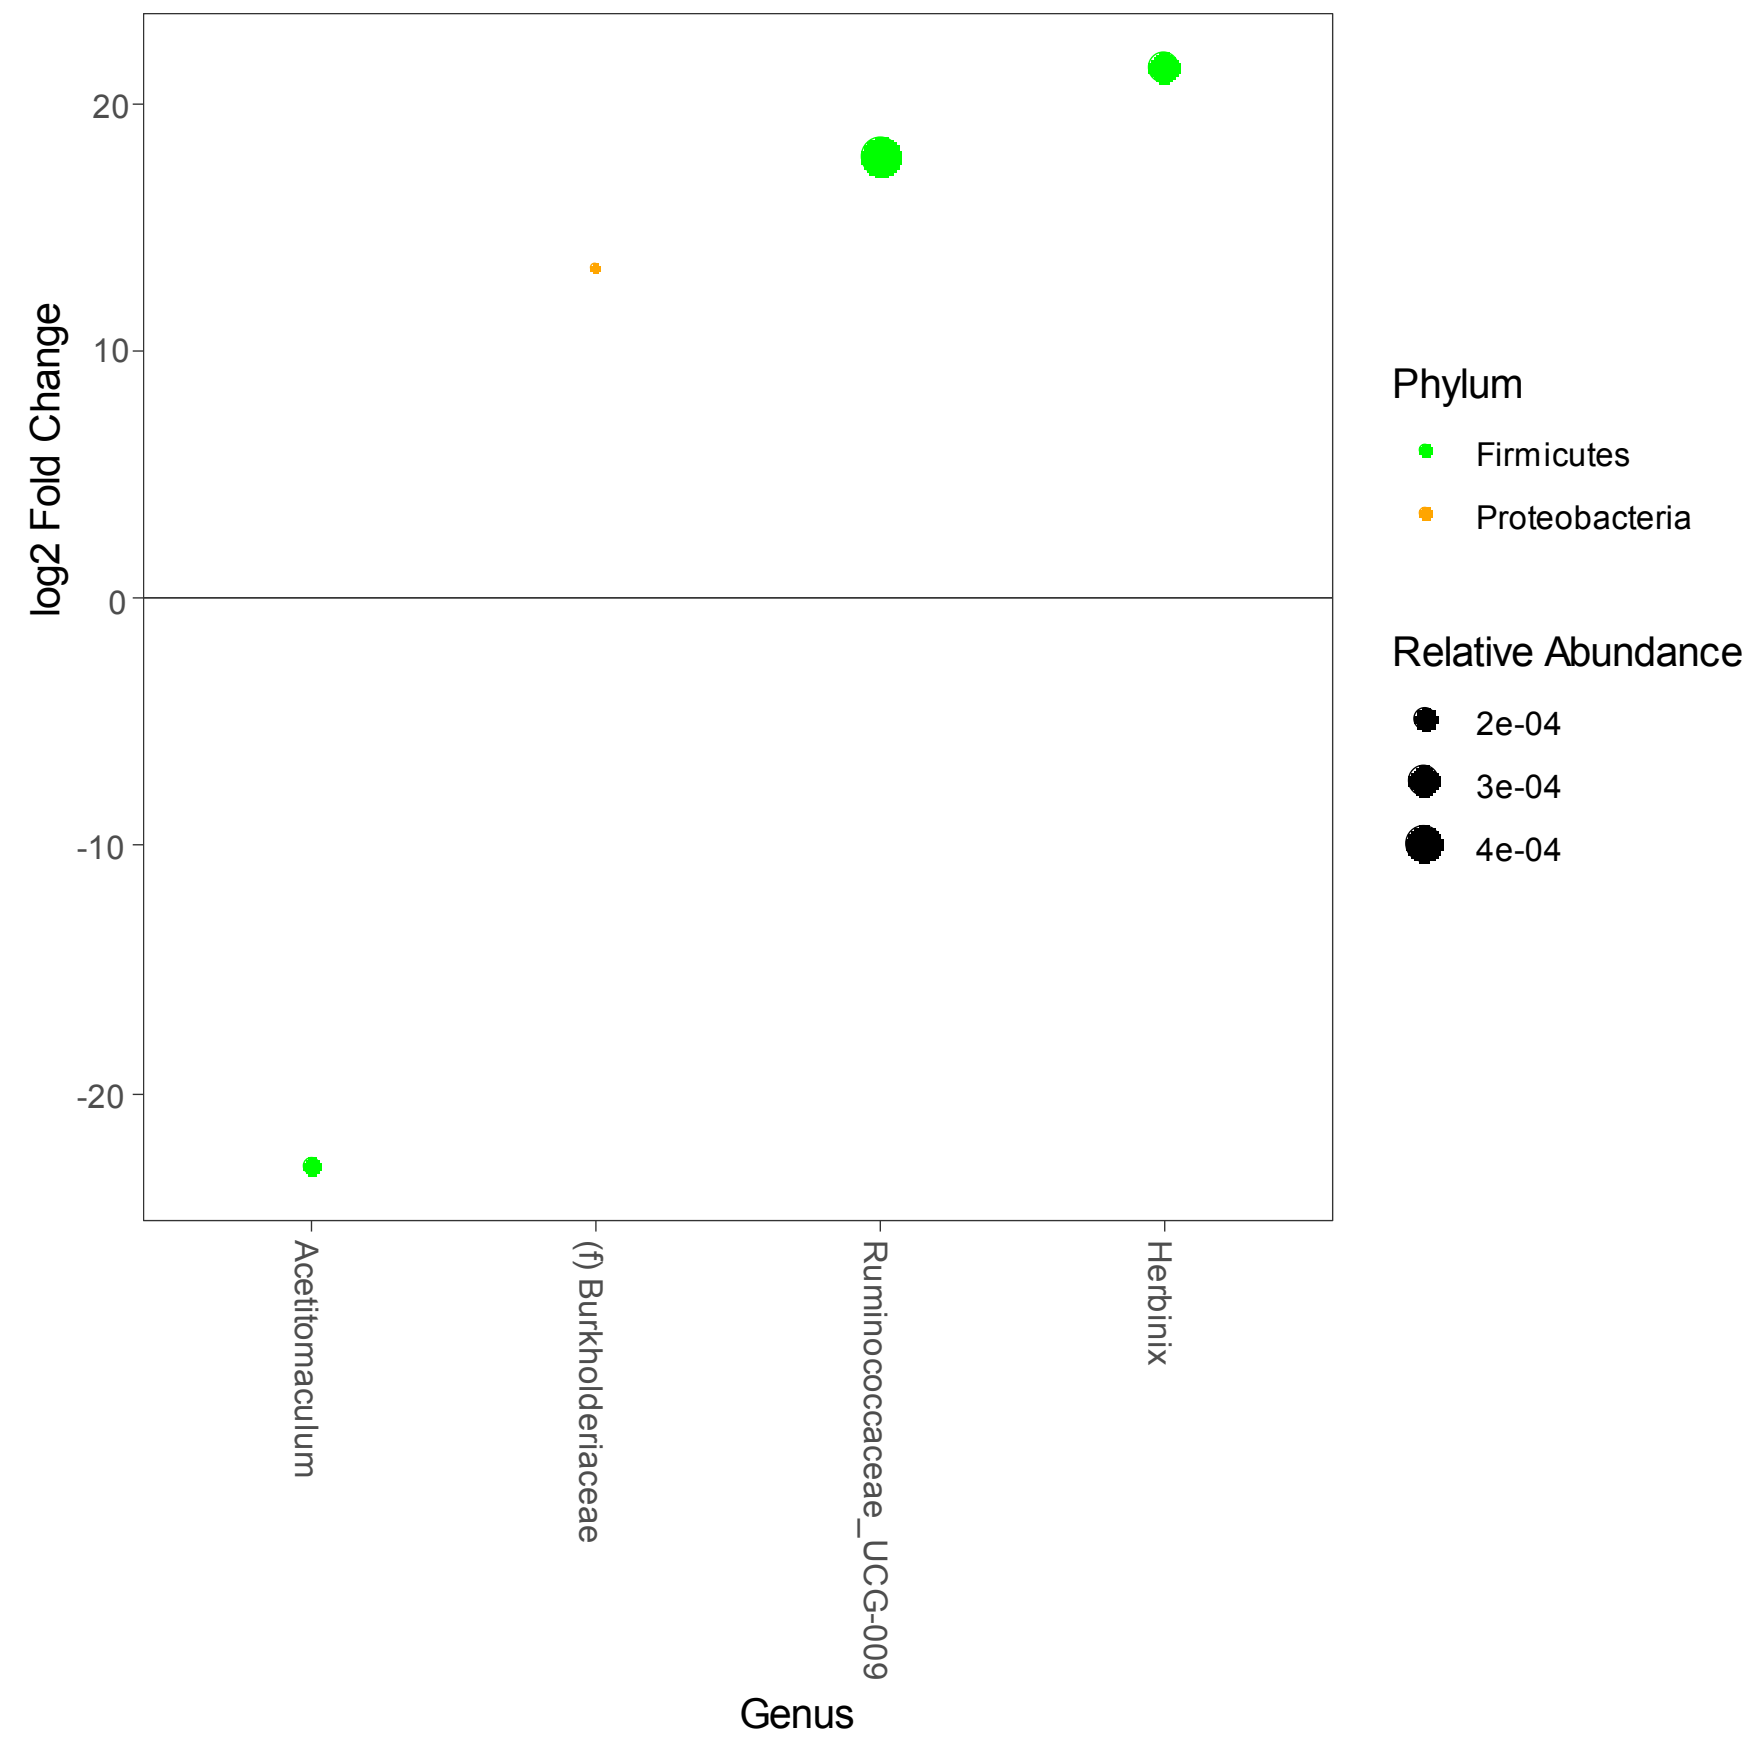

Rectal: Chronic vs Acute

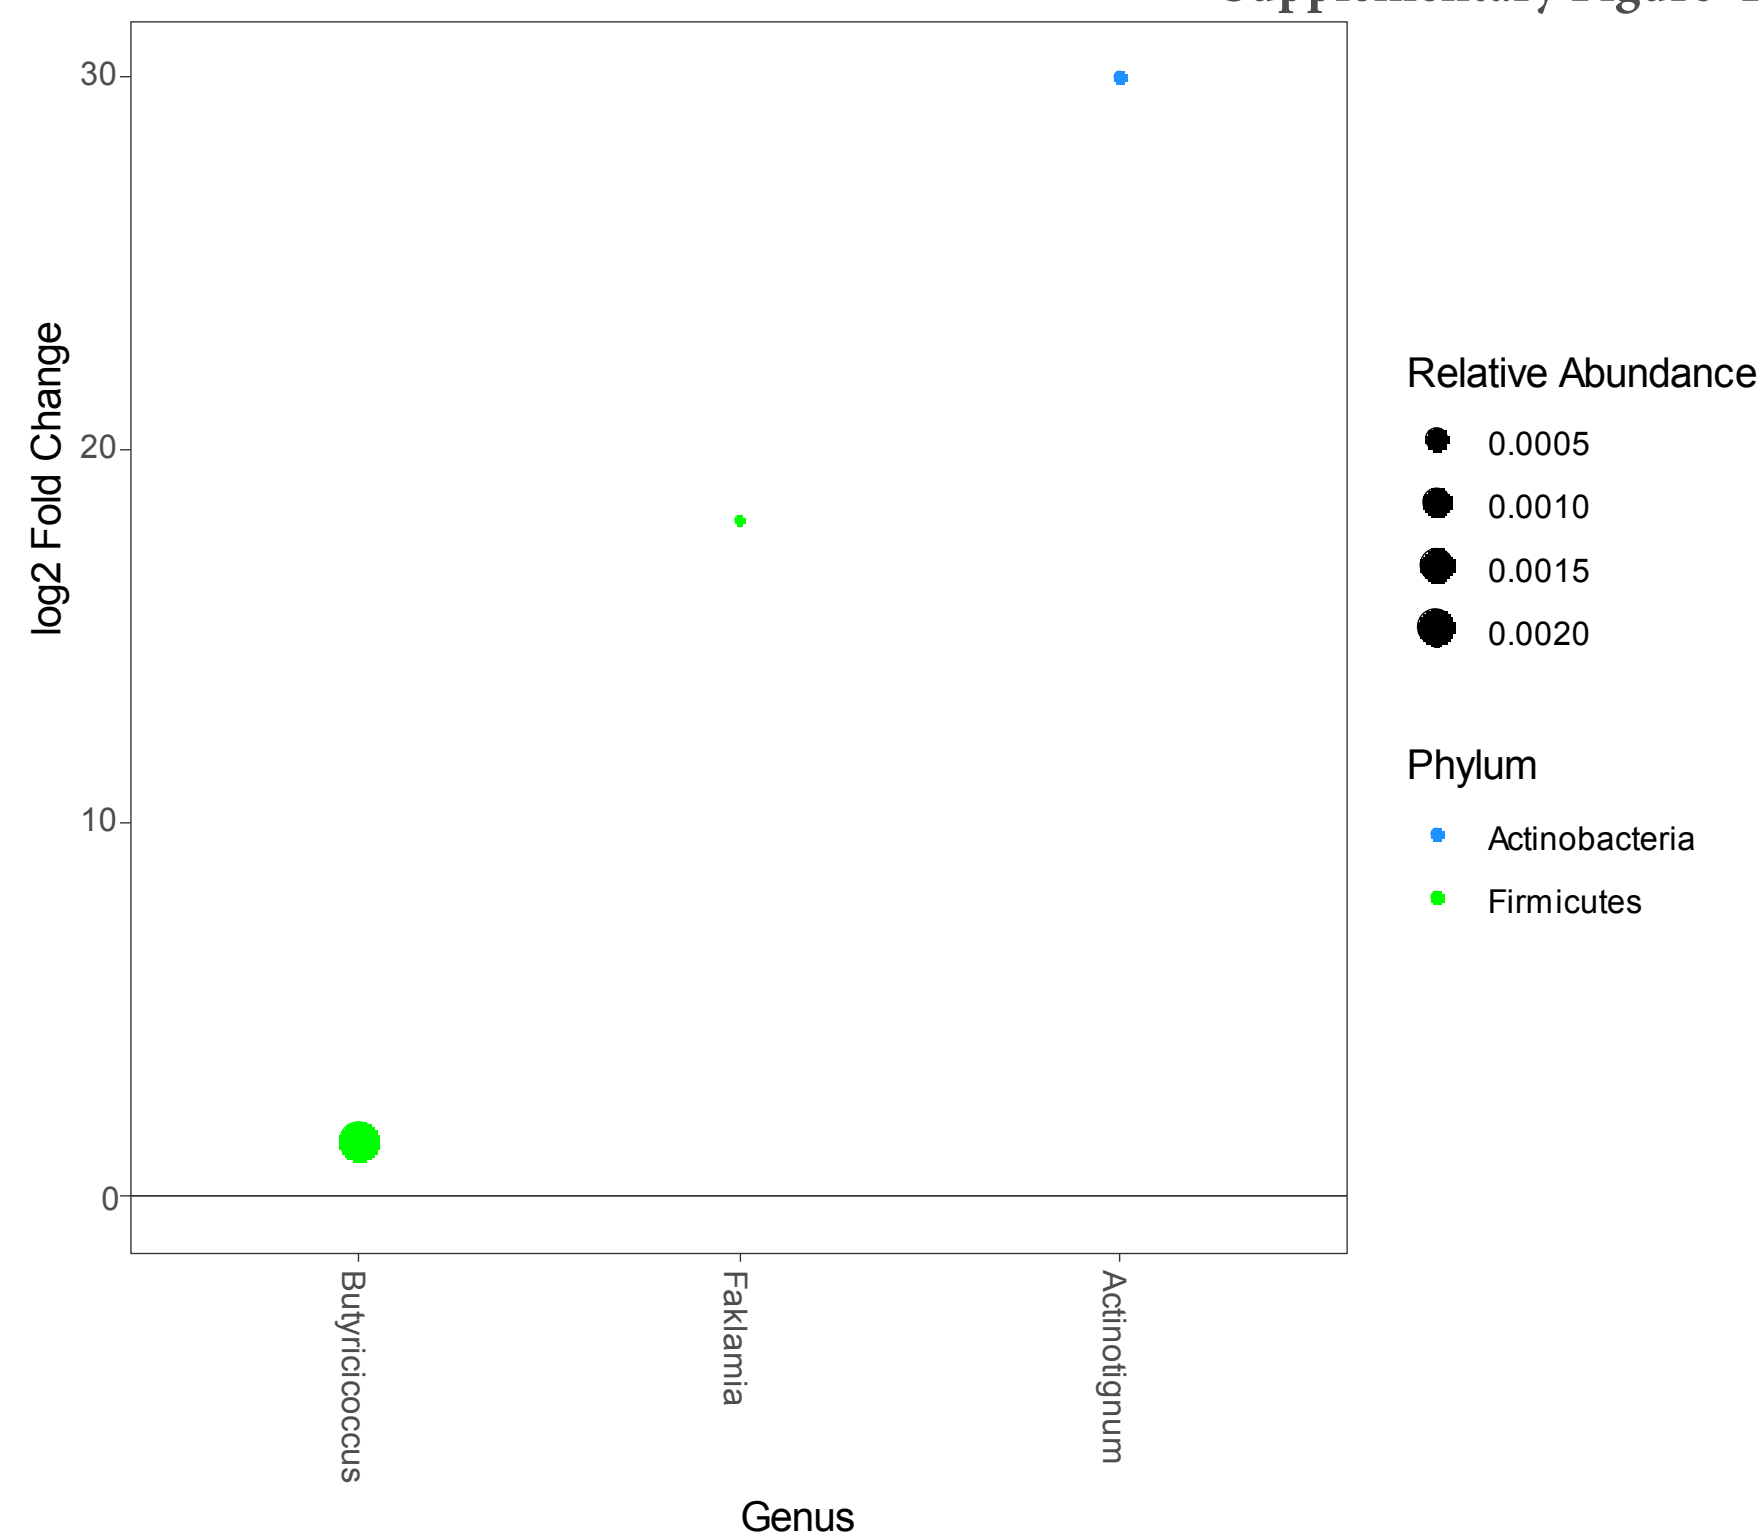

Vaginal: Chronic vs Acute

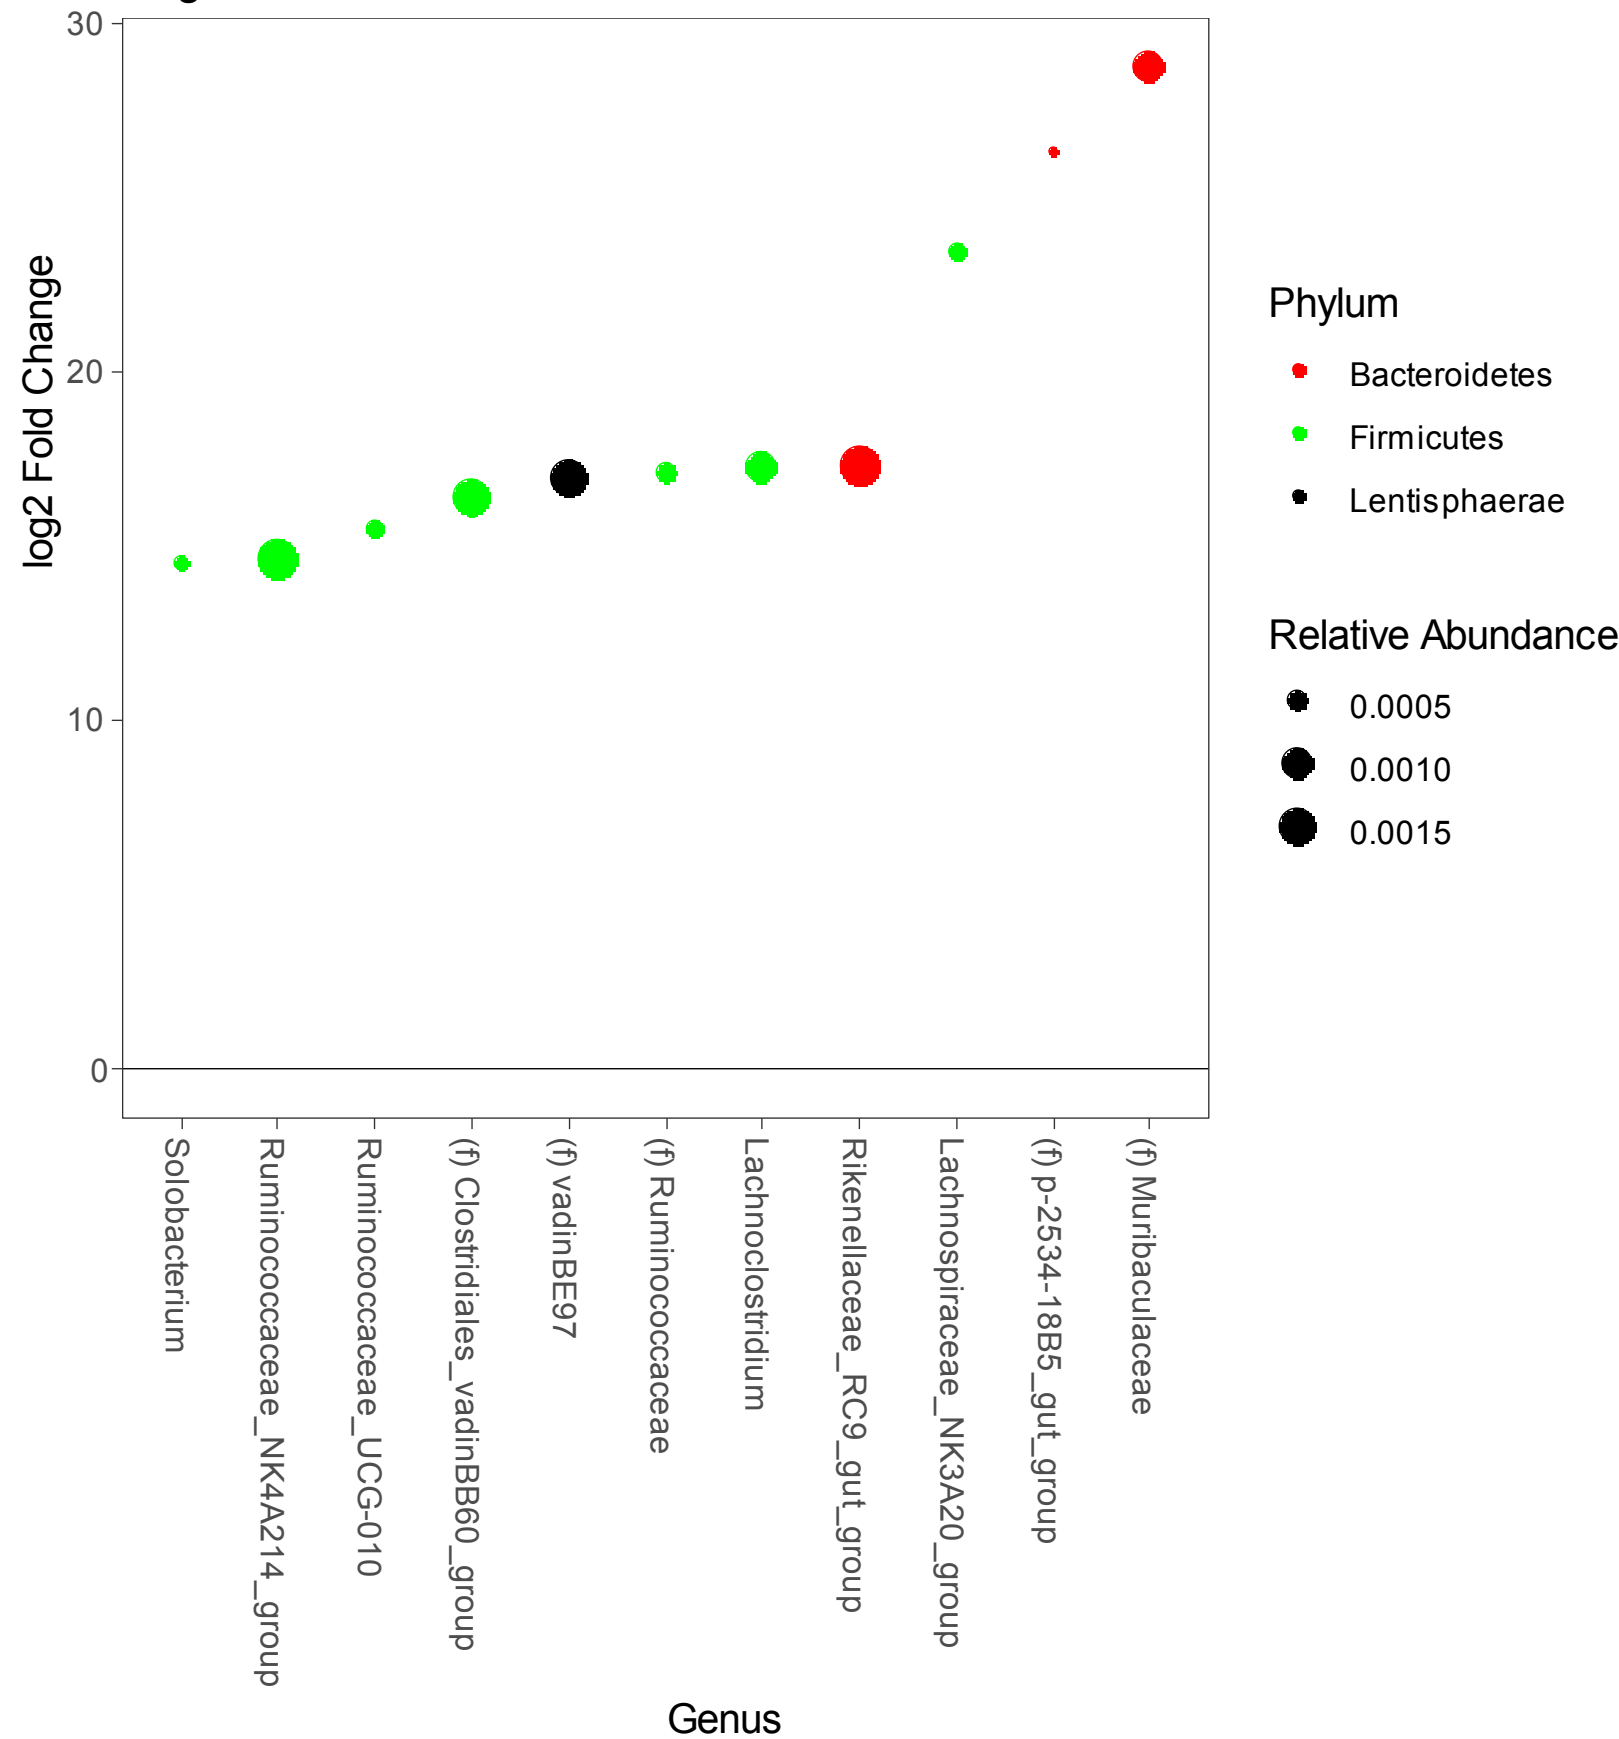



Supplementary Figure 15

ColorKey

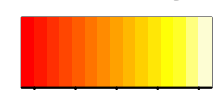

-1 0.5

Row Z-Score

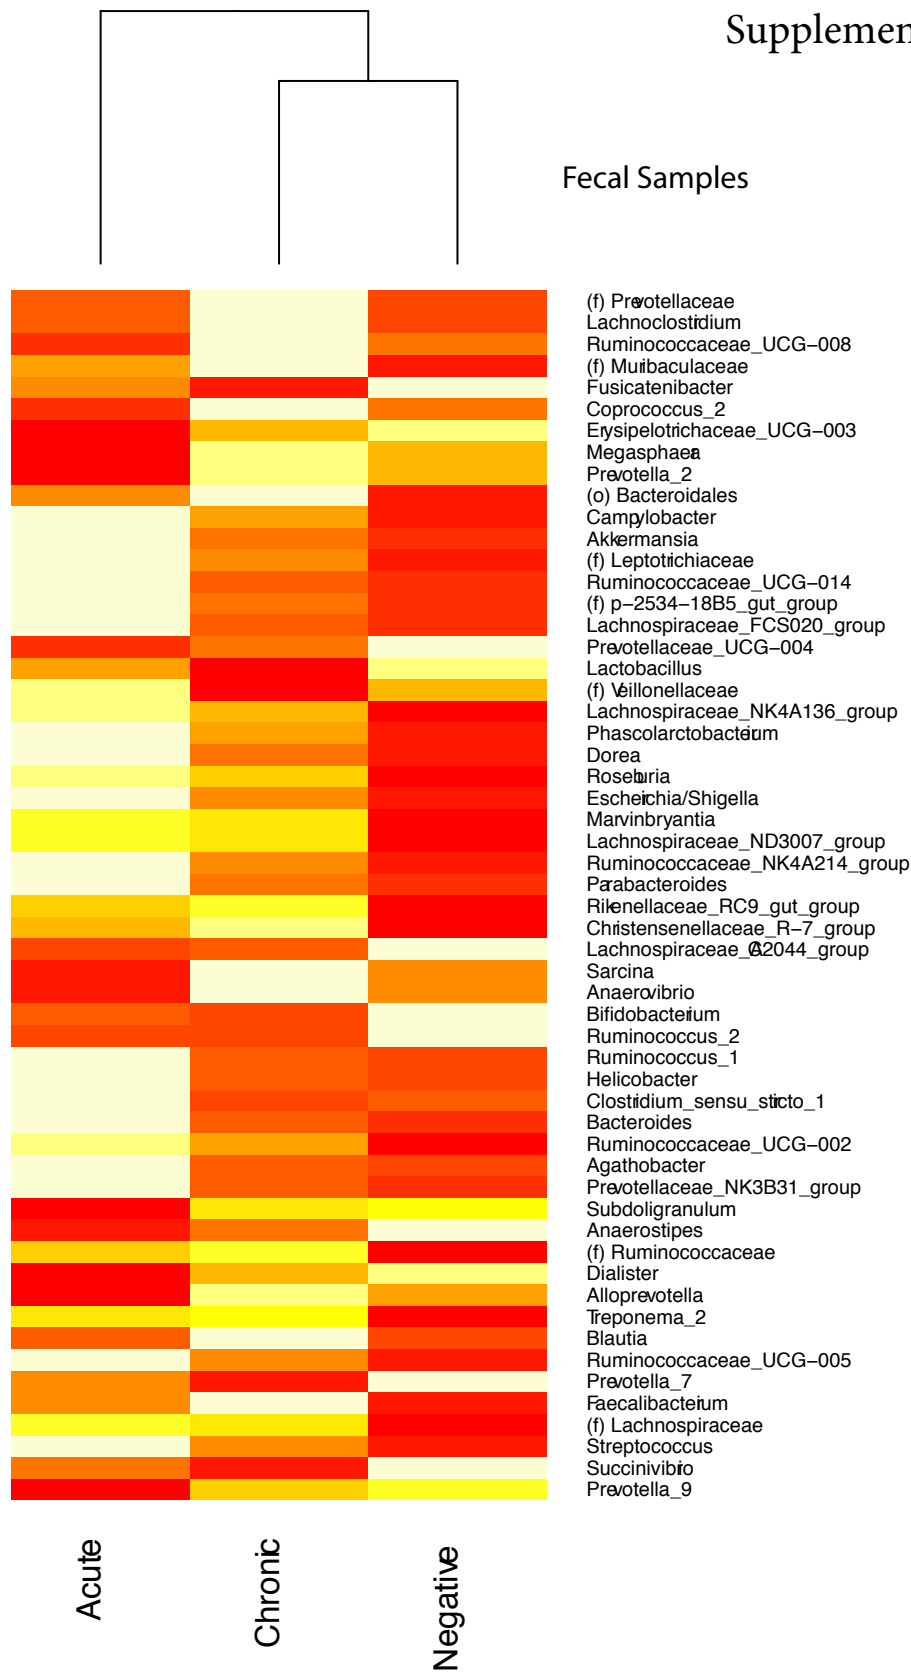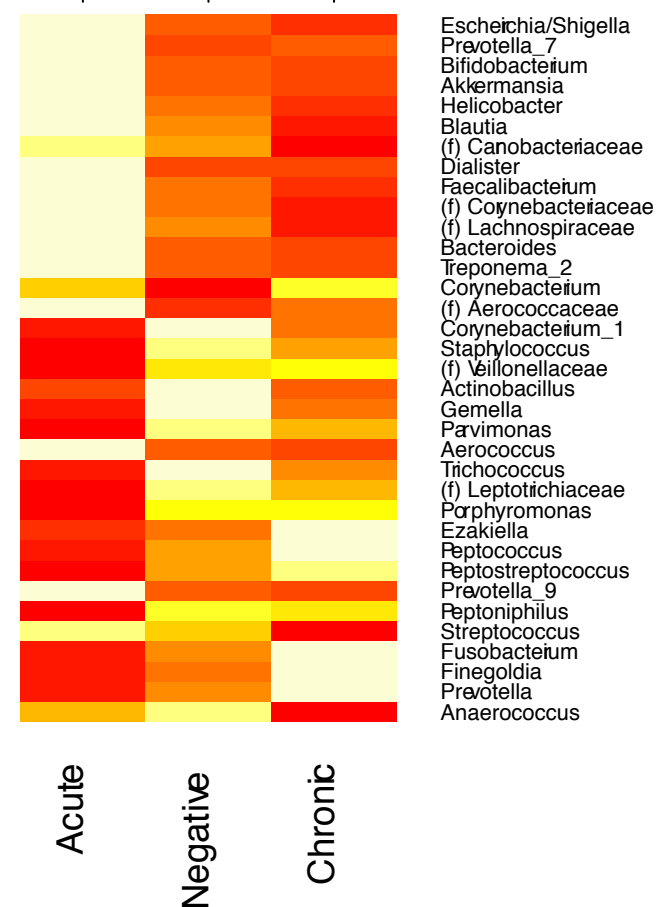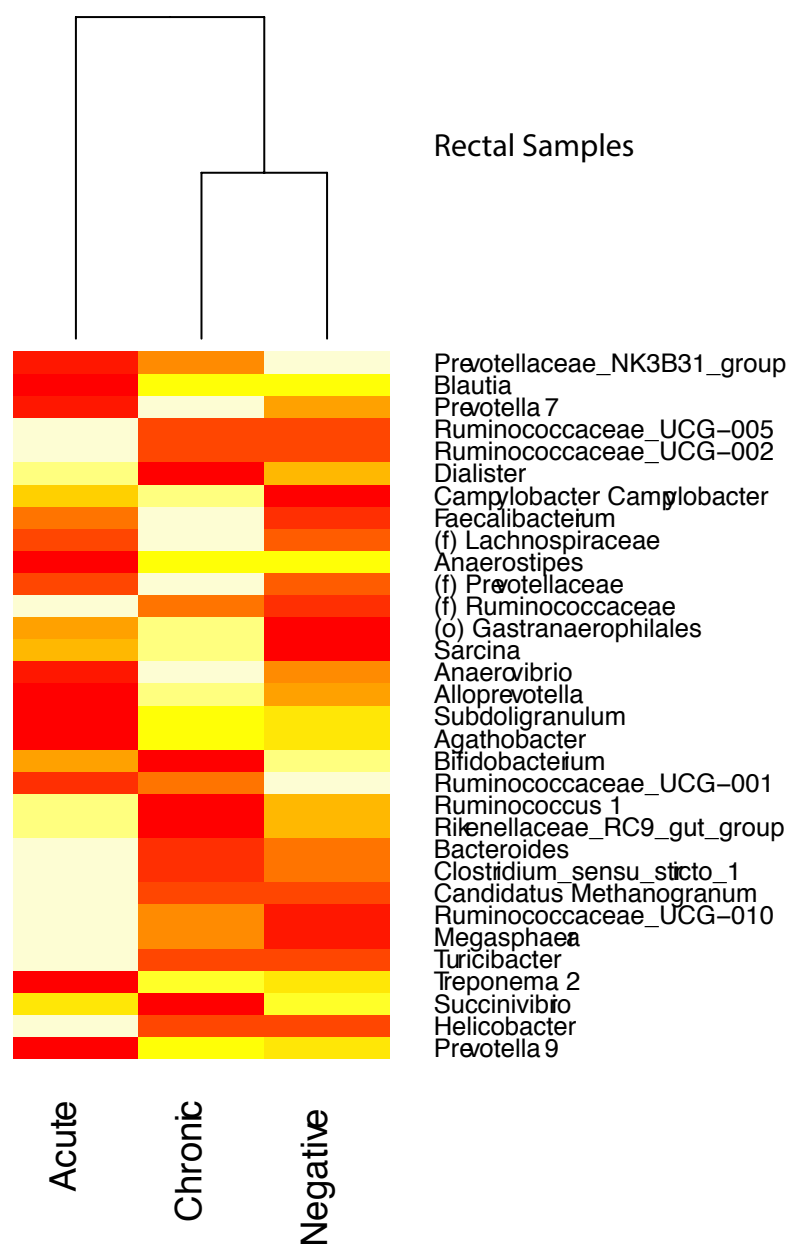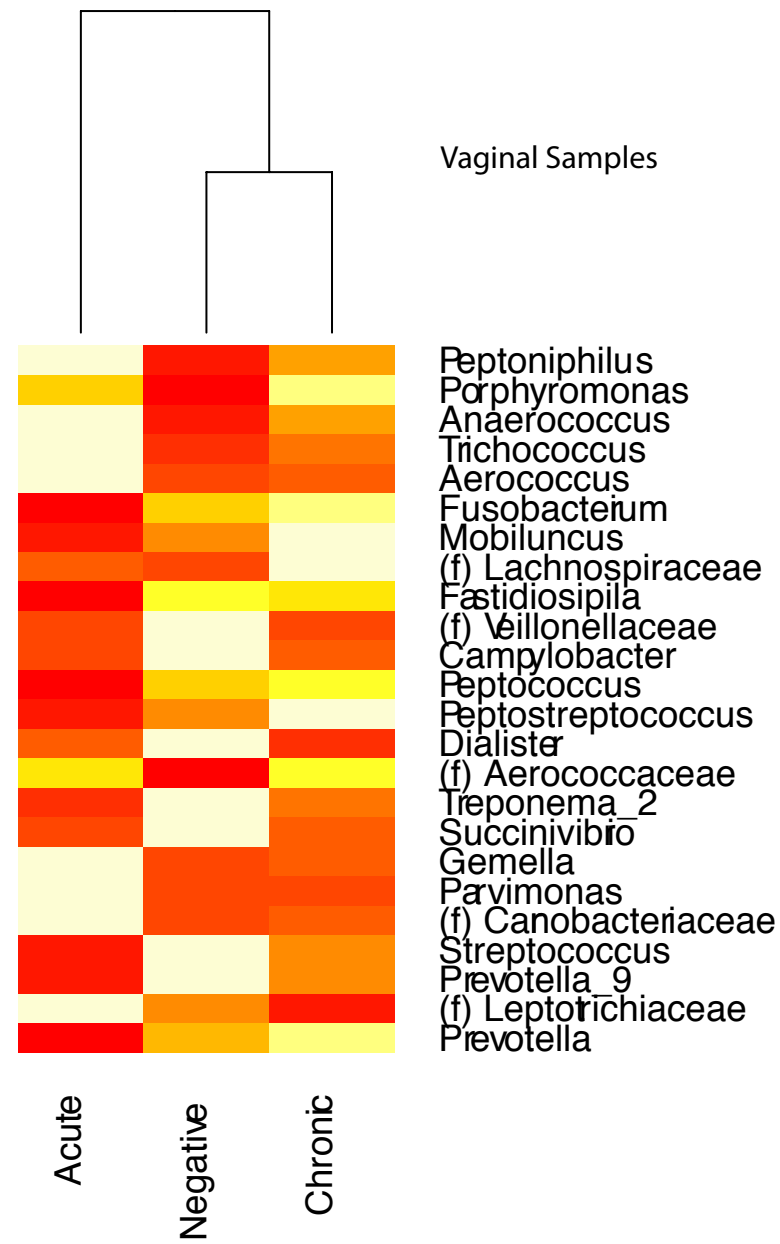



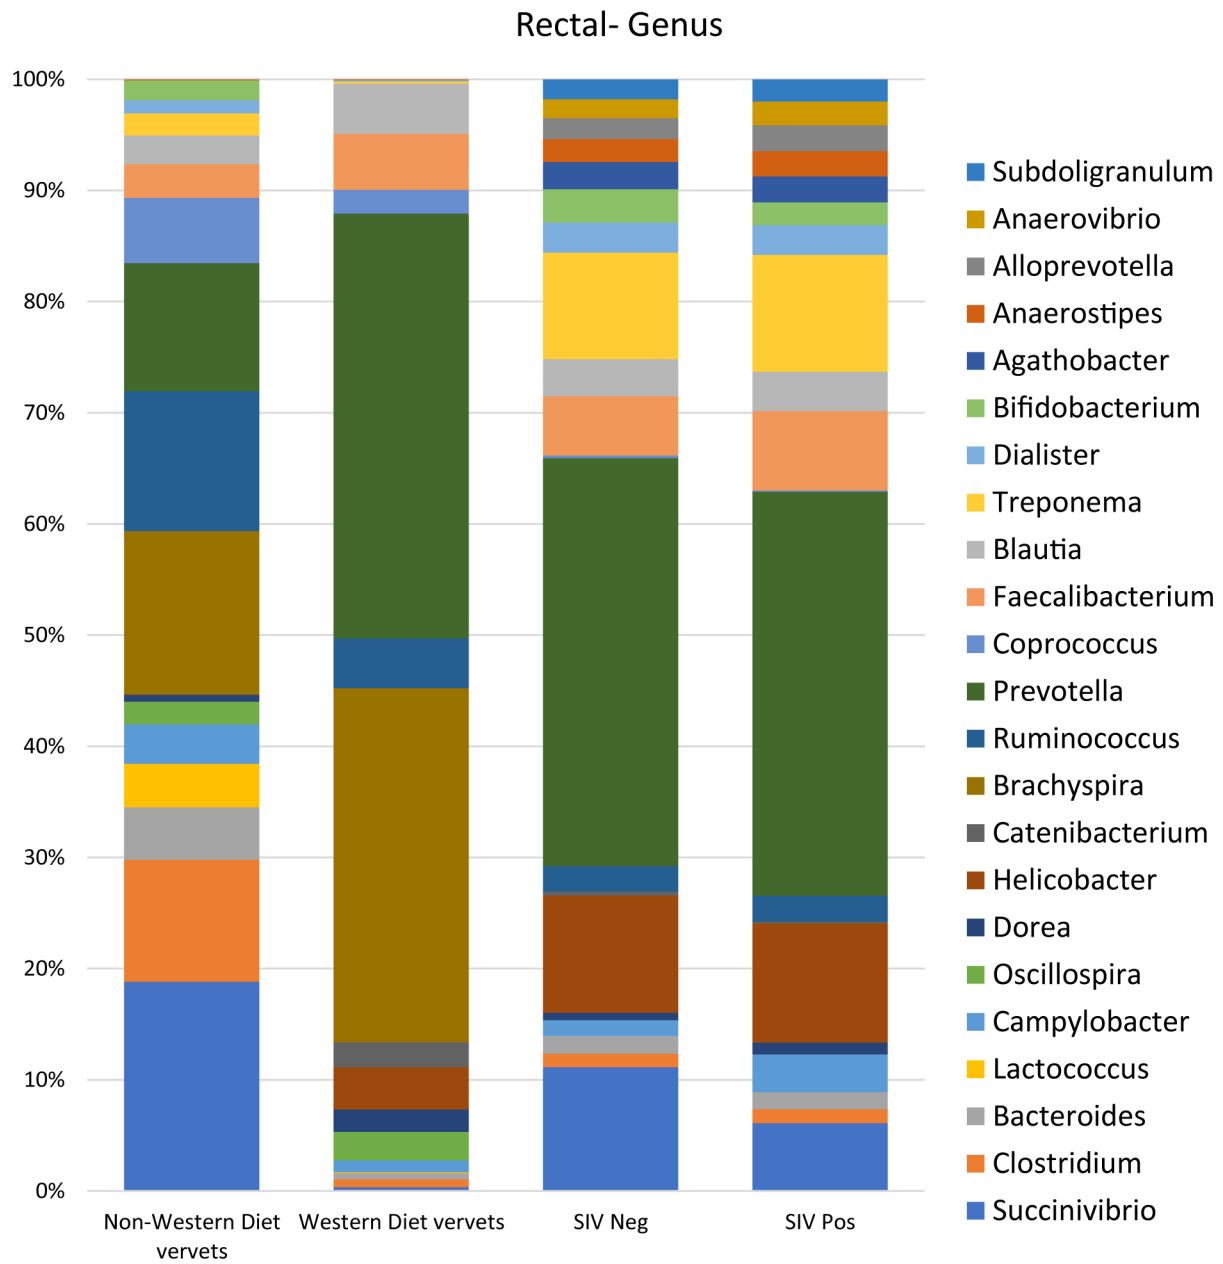

Supplement: 40168_2020_928_MOESM1_ESM.pdf [file 40168_2020_928_MOESM1_ESM.pdf]
